# Supplementary material for: Marker-assisted introgression of three dominant blast resistance genes into an aromatic rice cultivar Mushk Budji
Source: PubMed Central journal article supplement (PMC5840290; doi:10.1038/s41598-018-22246-4), 2018-03-06
Supplement: 41598_2018_22246_MOESM1_ESM.pdf [file 41598_2018_22246_MOESM1_ESM.pdf]

# **Marker-assisted introgression of three dominant blast resistance genes into an aromatic rice cultivar *Mushk Budji***

Gazala Hassan Khan<sup>1</sup>, Asif Bashir Shikari<sup>1\*</sup>, Rakesh Vaishnavi<sup>2</sup>, Sofi Najeeb<sup>3</sup>, Bilal A. Padder<sup>4</sup>, Zahoor A. Bhat<sup>4</sup>, Ghulam A. Parray<sup>3</sup>, Mohammad Ashraf Bhat<sup>5</sup>, Ram Kumar<sup>6</sup> and Nagendra K. Singh<sup>6</sup>

<sup>1</sup>Division of Plant Biotechnology, Sher-e-Kashmir University of Agricultural Sciences and Technology of Kashmir, Shalimar Campus, Srinagar, J & K, India

<sup>2</sup> DARS, Old Airport Road, Sher-e-Kashmir University of Agricultural Sciences and Technology of Kashmir, Budgam, J & K, India

<sup>3</sup>Mountain Research Centre for Field Crops, Sher-e-Kashmir University of Agricultural Sciences and Technology of Kashmir, Khudwani, J & K, India

<sup>4</sup>Division of Plant Pathology, Sher-e-Kashmir University of Agricultural Sciences and Technology of Kashmir, Shalimar Campus, Srinagar, J & K, India

<sup>5</sup>Division of Genetics and Plant Breeding, Sher-e-Kashmir University of Agricultural Sciences and Technology of Kashmir, FOA, Wadura, Sopore, Baramullah, J&K, India

<sup>6</sup>ICAR- National Research Centre on Plant Biotechnology, Lal Bahadur Shastri Building, Pusa Campus, New Delhi, India

**\*Corresponding author E-mail: [asifshikari@gmail.com](mailto:asifshikari@gmail.com)**

**Supplementary Table S1: Agronomic performance of three-gene BC<sub>1</sub>F<sub>1</sub> derived BC<sub>1</sub>F<sub>2</sub> plants of *Mushk Budji* / DHMAS 70Q 164-1b**

| <b>Plant ID</b>           | <b>Pi54</b> | <b>Pi1</b> | <b>Pita</b> | <b>PH</b>                   | <b>NT</b>                  | <b>PL</b>                  | <b>SP</b>                   | <b>SF</b>                  | <b>GY</b>                  |
|---------------------------|-------------|------------|-------------|-----------------------------|----------------------------|----------------------------|-----------------------------|----------------------------|----------------------------|
| SKUA-485-27-13            | B           | B          | A           | 120                         | 20                         | 23                         | 95                          | 68.42                      | 11.9                       |
| SKUA-485-27-20            | B           | B          | B           | 104                         | 12                         | 21                         | 115                         | 72.2                       | 8.6                        |
| SKUA-485-27-32            | B           | B          | B           | 115                         | 15                         | 23                         | 152                         | 88.8                       | 14.3                       |
| SKUA-485-27-43            | B           | A          | B           | 133                         | 21                         | 24                         | 175                         | 69.1                       | 23.0                       |
| SKUA-485-27-47            | B           | B          | A           | 118                         | 13                         | 22                         | 92                          | 89.1                       | 7.5                        |
| SKUA-485-27-50            | B           | B          | B           | 123                         | 12                         | 19                         | 93                          | 97.8                       | 7.0                        |
| SKUA-485-27-56            | B           | B          | B           | 132                         | 11                         | 22                         | 100                         | 89.0                       | 6.9                        |
| SKUA-485-27-61            | B           | B          | B           | 140                         | 15                         | 21                         | 85                          | 82.9                       | 8.0                        |
| SKUA-485-27-64            | B           | B          | A           | 135                         | 12                         | 23                         | 174                         | 64.9                       | 13.1                       |
| SKUA-485-27-70            | B           | B          | B           | 117                         | 21                         | 21                         | 197                         | 84.3                       | 25.9                       |
| SKUA-485-27-77            | B           | B          | B           | 127                         | 20                         | 21                         | 122                         | 89.2                       | 15.3                       |
| SKUA-485-27-78            | B           | B          | B           | 103                         | 16                         | 21                         | 112                         | 85.2                       | 11.2                       |
| SKUA-485-27-81            | B           | B          | B           | 120                         | 17                         | 21                         | 111                         | 81.4                       | 11.8                       |
| SKUA-485-27-86            | A           | B          | B           | 113                         | 20                         | 23                         | 146                         | 80.1                       | 18.3                       |
| <b>Mean</b>               |             |            |             | <b>121.4</b><br><b>±3.0</b> | <b>16.1</b><br><b>±1.0</b> | <b>21.8</b><br><b>±0.4</b> | <b>126.4</b><br><b>±9.6</b> | <b>81.6</b><br><b>±2.6</b> | <b>13.0</b><br><b>±1.6</b> |
| <b>MAX</b>                |             |            |             | <b>140.0</b>                | <b>21.0</b>                | <b>24.0</b>                | <b>197.0</b>                | <b>97.8</b>                | <b>25.9</b>                |
| <b>MIN</b>                |             |            |             | <b>103.0</b>                | <b>11.0</b>                | <b>19.0</b>                | <b>85.0</b>                 | <b>64.9</b>                | <b>6.9</b>                 |
| <b>DHMAS 70Q 164-1b</b>   | <b>B</b>    | <b>B</b>   | <b>B</b>    | <b>107</b>                  | <b>15.6</b>                | <b>20.5</b>                | <b>124.7</b>                | <b>65.2</b>                | <b>12.2</b>                |
| <b><i>Mushk Budji</i></b> | <b>A</b>    | <b>A</b>   | <b>A</b>    | <b>127</b>                  | <b>15.4</b>                | <b>19.6</b>                | <b>114</b>                  | <b>86.1</b>                | <b>11.0</b>                |

PH: Plant Height (cm), NT: Number of effective Tillers/ plant, PL: Panicle Length (cm), SP: Spikelets/ Plant, SF: Spikelet Fertility (%), GY: Grain Yield/ plant (g), A: Recipient (susceptible) parent allele, B: Donor (resistant) Parent allele

**Supplementary Table S2: Kernel traits and cooking quality of three-gene BC<sub>1</sub>F<sub>1</sub> derived BC<sub>1</sub>F<sub>2</sub> plants of *Mushk Budji*/ DHMAS 70Q 164-1b**

| <b>Plant ID</b>           | <b>Pi54</b> | <b>Pi1</b> | <b>Pita</b> | <b>KLBC</b>    | <b>LBR</b>     | <b>KLAC</b>    | <b>KER</b>      | <b>Aroma</b> |
|---------------------------|-------------|------------|-------------|----------------|----------------|----------------|-----------------|--------------|
| SKUA-485-27-13            | B           | B          | A           | 4.50           | 1.8            | 7.00           | 1.56            | 1            |
| SKUA-485-27-20            | B           | B          | B           | 5.0            | 2.5            | 8.2            | 1.64            | 1            |
| SKUA-485-27-32            | B           | B          | B           | 4.5            | 1.8            | 7.0            | 1.56            | 2            |
| SKUA-485-27-43            | B           | A          | B           | 5.0            | 2.0            | 7.6            | 1.52            | 0            |
| SKUA-485-27-47            | B           | B          | A           | 4.5            | 1.8            | 7.0            | 1.56            | 2            |
| SKUA-485-27-50            | B           | B          | B           | 4.5            | 1.8            | 7.0            | 1.56            | 1            |
| SKUA-485-27-56            | B           | B          | B           | 5.0            | 2.5            | 7.8            | 1.56            | 2            |
| SKUA-485-27-61            | B           | B          | B           | 5.0            | 2.0            | 7.5            | 1.50            | 1            |
| SKUA-485-27-64            | B           | B          | A           | 4.4            | 1.8            | 7.0            | 1.59            | 1            |
| SKUA-485-27-70            | B           | B          | B           | 5.0            | 2.1            | 7.0            | 1.40            | 1            |
| SKUA-485-27-77            | B           | B          | B           | 4.5            | 2.3            | 8.4            | 1.87            | 1            |
| SKUA-485-27-78            | B           | B          | B           | 4.5            | 1.8            | 7.0            | 1.56            | 1            |
| SKUA-485-27-81            | B           | B          | B           | 4.5            | 1.9            | 7.0            | 1.56            | 1            |
| SKUA-485-27-86            | A           | B          | B           | 5.0            | 2.0            | 8.6            | 1.72            | 1            |
| <b>Mean</b>               |             |            |             | <b>4.7±0.1</b> | <b>2.0±0.1</b> | <b>7.4±0.2</b> | <b>1.58±0.1</b> |              |
| <b>MAX</b>                |             |            |             | <b>5.0</b>     | <b>2.0</b>     | <b>8.6</b>     | <b>1.72</b>     |              |
| <b>MIN</b>                |             |            |             | <b>4.4</b>     | <b>2.2</b>     | <b>7.0</b>     | <b>1.59</b>     |              |
| <b>DHMAS 70Q 164-1b</b>   | <b>B</b>    | <b>B</b>   | <b>B</b>    | <b>6.5</b>     | <b>2.6</b>     | <b>10.5</b>    | <b>1.62</b>     | <b>0</b>     |
| <b><i>Mushk Budji</i></b> | <b>A</b>    | <b>A</b>   | <b>A</b>    | <b>5.2</b>     | <b>1.6</b>     | <b>7.7</b>     | <b>1.48</b>     | <b>2</b>     |

KLBC: Kernel Length Before Cooking (mm), LBR: Length Breadth Ratio, KLAC: Kernel Length After Cooking (mm), KER: Kernel Elongation Ratio, Aroma: (0-2 scale), A: Recipient parent allele, B: Donor Parent allele

**Supplementary Table S3: Agronomic performance of two-gene BC<sub>1</sub>F<sub>1</sub> derived BC<sub>1</sub>F<sub>2</sub> plants of *Mushk Budji/ DHMAS 70Q 164-1b***

| <b>Plant ID</b> | <b>PH</b> | <b>NT</b> | <b>PL</b> | <b>SP</b> | <b>SF</b> | <b>GY</b> |
|-----------------|-----------|-----------|-----------|-----------|-----------|-----------|
| SKUA-485-9-1    | 115       | 7         | 15        | 193       | 93        | 8.4       |
| SKUA-485-9-2    | 108       | 6         | 18        | 218       | 88        | 8.2       |
| SKUA-485-9-3    | 105       | 5         | 20        | 210       | 80        | 6.6       |
| SKUA-485-9-4    | 145       | 26        | 29        | 181       | 78        | 29.4      |
| SKUA-485-9-5    | 143       | 28        | 18        | 222       | 89        | 38.9      |
| SKUA-485-9-6    | 140       | 15        | 23        | 185       | 94        | 17.3      |
| SKUA-485-12-1   | 121       | 12        | 22        | 183       | 89        | 13.7      |
| SKUA-485-12-2   | 117       | 19        | 23        | 179       | 85        | 21.3      |
| SKUA-485-12-3   | 113       | 17        | 24        | 175       | 92        | 18.6      |
| SKUA-485-14-1   | 110       | 17        | 22        | 228       | 92        | 24.2      |
| SKUA-485-14-2   | 115       | 22        | 27        | 218       | 81        | 30.0      |
| SKUA-485-14-3   | 118       | 13        | 23        | 204       | 88        | 16.6      |
| SKUA-485-17-1   | 110       | 12        | 22        | 212       | 94        | 15.9      |
| SKUA-485-17-2   | 115       | 15        | 25        | 209       | 93        | 19.6      |
| SKUA-485-17-3   | 120       | 12        | 22        | 195       | 85        | 14.6      |
| SKUA-485-21-1   | 145       | 13        | 29        | 202       | 79        | 16.4      |
| SKUA-485-21-2   | 118       | 14        | 25        | 177       | 82        | 15.5      |
| SKUA-485-21-3   | 122       | 9         | 22        | 181       | 77        | 10.2      |
| SKUA-485-22-1   | 110       | 11        | 22        | 223       | 78        | 15.3      |
| SKUA-485-22-2   | 107       | 11        | 21        | 190       | 95        | 13.1      |
| SKUA-485-22-3   | 115       | 18        | 21        | 180       | 91        | 20.3      |
| SKUA-485-26-1   | 115       | 19        | 24        | 201       | 75        | 23.9      |
| SKUA-485-26-2   | 122       | 9         | 21        | 218       | 77        | 12.3      |
| SKUA-485-26-3   | 121       | 10        | 20        | 222       | 90        | 13.9      |

PH: Plant Height (cm), NT: Number of effective Tillers/ plant, PL: Panicle Length (cm), SP: Spikelets/ Plant, SF: Spikelet Fertility (%), GY: Grain Yield/ plant (g)

**Supplementary Table S4: Kernel traits and cooking quality of two-gene BC<sub>1</sub>F<sub>1</sub> derived BC<sub>1</sub>F<sub>2</sub> plants of *Mushk Budji/ DHMAS 70Q 164-1b***

| Plant ID      | KLBC | LBR | KLAC | KER | Aroma | KLBC |
|---------------|------|-----|------|-----|-------|------|
| SKUA-485-9-1  | 5.3  | 2.9 | 1.8  | 7.3 | 1.4   | 1    |
| SKUA-485-9-2  | 5.0  | 3.0 | 1.7  | 7.0 | 1.4   | 1    |
| SKUA-485-9-3  | 5.1  | 2.9 | 1.8  | 6.9 | 1.4   | 1    |
| SKUA-485-9-4  | 5.1  | 3.0 | 1.7  | 7.2 | 1.4   | 1    |
| SKUA-485-9-5  | 5.1  | 3.4 | 1.5  | 6.8 | 1.3   | 1    |
| SKUA-485-9-6  | 4.9  | 3.0 | 1.6  | 7.3 | 1.5   | 1    |
| SKUA-485-12-1 | 4.8  | 3.2 | 1.5  | 7.1 | 1.5   | 2    |
| SKUA-485-12-2 | 5.2  | 3.4 | 1.5  | 6.8 | 1.3   | 2    |
| SKUA-485-12-3 | 4.8  | 2.8 | 1.7  | 7.5 | 1.6   | 2    |
| SKUA-485-14-1 | 5.0  | 3.5 | 1.4  | 6.8 | 1.4   | 1    |
| SKUA-485-14-2 | 5.0  | 3.5 | 1.4  | 7.2 | 1.4   | 2    |
| SKUA-485-14-3 | 4.9  | 3.5 | 1.4  | 7.5 | 1.5   | 1    |
| SKUA-485-17-1 | 5.1  | 2.9 | 1.8  | 7.2 | 1.4   | 2    |
| SKUA-485-17-2 | 5.0  | 2.9 | 1.7  | 7.3 | 1.5   | 2    |
| SKUA-485-17-3 | 5.1  | 3.0 | 1.7  | 7.1 | 1.4   | 2    |
| SKUA-485-21-1 | 4.8  | 3.1 | 1.5  | 7.4 | 1.5   | 2    |
| SKUA-485-21-2 | 5.3  | 3.5 | 1.5  | 6.8 | 1.3   | 2    |
| SKUA-485-21-3 | 4.8  | 3.5 | 1.4  | 7.5 | 1.6   | 2    |
| SKUA-485-22-1 | 5.3  | 3.3 | 1.6  | 6.8 | 1.3   | 1    |
| SKUA-485-22-2 | 4.8  | 3.3 | 1.5  | 7.5 | 1.6   | 1    |
| SKUA-485-22-3 | 5.2  | 3.0 | 1.7  | 7.5 | 1.4   | 2    |
| SKUA-485-26-1 | 4.9  | 3.4 | 1.4  | 7.2 | 1.5   | 1    |
| SKUA-485-26-2 | 5.1  | 3.3 | 1.5  | 7.1 | 1.4   | 1    |
| SKUA-485-26-3 | 4.9  | 3.0 | 1.6  | 6.9 | 1.4   | 1    |

KLBC: Kernel length before cooking (mm), KBBC: Kernel breadth before cooking (mm), LBR: Length breadth ratio, KLAC: Kernel length after cooking (mm), KER: Kernel elongation ratio, Aroma: (0-2 scale)

**Supplementary Table S5: Agronomic performance of BC<sub>1</sub>F<sub>2,3</sub> plants of *Mushk Budji*/ DHMAS 70Q 164-1b// *Mushk Budji***

| Plant ID                       |                                | PH            | NT           | PL           | SP            | SF           | GY           |
|--------------------------------|--------------------------------|---------------|--------------|--------------|---------------|--------------|--------------|
| BC <sub>1</sub> F <sub>2</sub> | BC <sub>1</sub> F <sub>3</sub> |               |              |              |               |              |              |
| SKUA-485-27-13                 |                                | 120           | 20           | 23.0         | 95            | 68.4         | 11.9         |
|                                | SKUA-485-27-13-1               | 117           | 24           | 24.5         | 142           | 82.4         | 21.3         |
|                                | SKUA-485-27-13-2               | 126           | 18           | 27.0         | 143           | 93.7         | 16.1         |
|                                | SKUA-485-27-13-3               | 127           | 10           | 23.0         | 172           | 91.3         | 30.8         |
|                                | SKUA-485-27-13-4               | 129           | 14           | 27.5         | 157           | 89.2         | 13.7         |
|                                | SKUA-485-27-13-5               | 127           | 13           | 22.5         | 139           | 84.2         | 11.3         |
|                                | SKUA-485-27-13-6               | 118           | 10           | 24.0         | 153           | 91.5         | 29.6         |
|                                | SKUA-485-27-13-7               | 130           | 13           | 23.5         | 149           | 85.9         | 12.1         |
|                                | SKUA-485-27-13-8               | 129           | 14           | 23.0         | 153           | 92.2         | 13.4         |
|                                | SKUA-485-27-13-9               | 125           | 18           | 25.0         | 137           | 84.7         | 15.4         |
|                                | <b>Mean</b>                    | <b>125.33</b> | <b>14.89</b> | <b>24.44</b> | <b>149.44</b> | <b>88.33</b> | <b>18.81</b> |
|                                | <b>CV (%)</b>                  | <b>3.76</b>   | <b>29.93</b> | <b>7.26</b>  | <b>7.30</b>   | <b>4.65</b>  | <b>25.82</b> |
| SKUA-485-27-20                 |                                | 104           | 12           | 21           | 115           | 72.2         | 8.6          |
|                                | SKUA-485-27-20-1               | 105           | 19           | 22.5         | 105           | 79.0         | 12.5         |
|                                | SKUA-485-27-20-2               | 128           | 10           | 19.5         | 154           | 92.9         | 9.6          |
|                                | SKUA-485-27-20-3               | 116           | 9            | 24.5         | 197           | 87.8         | 11.1         |
|                                | SKUA-485-27-20-4               | 120           | 9            | 20.0         | 109           | 83.5         | 6.1          |
|                                | SKUA-485-27-20-5               | 132           | 14           | 17.5         | 160           | 89.4         | 14.0         |
|                                | SKUA-485-27-20-6               | 130           | 13           | 19.5         | 167           | 92.8         | 13.6         |
|                                | SKUA-485-27-20-7               | 127           | 13           | 23.5         | 173           | 91.9         | 14.1         |
|                                | SKUA-485-27-20-8               | 113           | 8            | 19.0         | 144           | 91.0         | 7.2          |
|                                | SKUA-485-27-20-9               | 117           | 12           | 14.5         | 146           | 93.8         | 11.0         |
|                                | SKUA-485-27-20-10              | 116           | 7            | 27.0         | 157           | 91.1         | 6.9          |
|                                | SKUA-485-27-20-11              | 116           | 8            | 23.5         | 195           | 90.3         | 9.8          |
|                                | SKUA-485-27-20-12              | 110           | 10           | 24.5         | 138           | 86.2         | 8.6          |
|                                | SKUA-485-27-20-13              | 118           | 9            | 27.5         | 193           | 87.6         | 10.9         |
|                                | <b>Mean</b>                    | <b>119.08</b> | <b>10.85</b> | <b>21.77</b> | <b>156.77</b> | <b>89.02</b> | <b>10.40</b> |
|                                | <b>CV (%)</b>                  | <b>6.77</b>   | <b>30.31</b> | <b>17.48</b> | <b>18.75</b>  | <b>4.72</b>  | <b>25.85</b> |
| SKUA-485-27-32                 |                                | 115           | 15           | 23.0         | 152           | 88.8         | 14.3         |
|                                | SKUA-485-27-32-1               | 129           | 12           | 25.5         | 184           | 96.2         | 23.8         |
|                                | SKUA-485-27-32-2               | 127           | 6            | 20.5         | 139           | 89.2         | 15.2         |
|                                | SKUA-485-27-32-3               | 130           | 13           | 26.5         | 186           | 89.8         | 15.1         |
|                                | SKUA-485-27-32-4               | 115           | 11           | 22.5         | 160           | 96.9         | 11.0         |
|                                | SKUA-485-27-32-5               | 123           | 12           | 27.5         | 150           | 94.0         | 21.3         |
|                                | SKUA-485-27-32-6               | 116           | 12           | 24.0         | 109           | 75.2         | 8.2          |
|                                | SKUA-485-27-32-7               | 123           | 9            | 23.0         | 105           | 72.4         | 5.9          |
|                                | <b>Mean</b>                    | <b>123.29</b> | <b>10.71</b> | <b>24.21</b> | <b>147.57</b> | <b>87.67</b> | <b>10.07</b> |
|                                | <b>CV (%)</b>                  | <b>4.84</b>   | <b>22.68</b> | <b>10.11</b> | <b>22.02</b>  | <b>11.34</b> | <b>37.64</b> |
| SKUA-485-27-43                 |                                | 133           | 21           | 24           | 175           | 69.1         | 23.0         |
|                                | SKUA-485-27-43-1               | 125           | 15           | 23.5         | 152           | 92.8         | 14.3         |
|                                | SKUA-485-27-43-2               | 139           | 11           | 23.0         | 140           | 82.9         | 9.6          |
|                                | SKUA-485-27-43-3               | 133           | 7            | 24.5         | 170           | 88.8         | 7.4          |
|                                | SKUA-485-27-43-4               | 131           | 12           | 25.0         | 152           | 92.1         | 11.4         |
|                                | SKUA-485-27-43-5               | 147           | 8            | 25.5         | 162           | 90.7         | 8.1          |
|                                | SKUA-485-27-43-6               | 155           | 9            | 22.0         | 142           | 90.8         | 8.0          |
|                                | SKUA-485-27-43-7               | 131           | 10           | 23.5         | 135           | 88.1         | 8.4          |
|                                | SKUA-485-27-43-8               | 137           | 10           | 24.5         | 140           | 87.9         | 8.8          |
|                                | SKUA-485-27-43-9               | 139           | 12           | 24.0         | 139           | 84.9         | 10.4         |
|                                | <b>Mean</b>                    | <b>137.44</b> | <b>10.44</b> | <b>23.94</b> | <b>148.00</b> | <b>88.78</b> | <b>9.60</b>  |
|                                | <b>CV (%)</b>                  | <b>6.62</b>   | <b>23.01</b> | <b>4.48</b>  | <b>8.02</b>   | <b>3.70</b>  | <b>22.44</b> |
| SKUA-485-27-47                 |                                | 118           | 13           | 22           | 92            | 89.1         | 7.5          |
|                                | SKUA-485-27-47-1               | 134           | 17           | 23.0         | 135           | 91.1         | 14.3         |
|                                | SKUA-485-27-47-2               | 133           | 15           | 24.0         | 143           | 90.2         | 13.4         |

|                |                   |               |              |              |               |              |              |
|----------------|-------------------|---------------|--------------|--------------|---------------|--------------|--------------|
|                | SKUA-485-27-47-3  | 130           | 22           | 24.5         | 147           | 91.2         | 20.2         |
|                | SKUA-485-27-47-4  | 139           | 18           | 27.5         | 193           | 90.2         | 21.7         |
|                | SKUA-485-27-47-5  | 138           | 17           | 26.5         | 194           | 88.1         | 20.6         |
|                | <b>Mean</b>       | <b>134.80</b> | <b>17.80</b> | <b>25.10</b> | <b>162.40</b> | <b>90.16</b> | <b>18.06</b> |
|                | <b>CV (%)</b>     | <b>2.75</b>   | <b>14.54</b> | <b>7.37</b>  | <b>17.68</b>  | <b>1.35</b>  | <b>21.44</b> |
| SKUA-485-27-50 |                   | 123           | 12           | 19           | 93            | 97.8         | 7.0          |
|                | SKUA-485-27-50-1  | 119           | 13           | 26.5         | 159           | 89.9         | 12.9         |
|                | SKUA-485-27-50-2  | 133           | 8            | 27.5         | 179           | 88.3         | 9.0          |
|                | SKUA-485-27-50-3  | 121           | 5            | 26.5         | 149           | 83.9         | 4.7          |
|                | SKUA-485-27-50-4  | 142           | 7            | 27.5         | 165           | 86.1         | 7.2          |
|                | SKUA-485-27-50-5  | 129           | 9            | 27.5         | 185           | 86.5         | 10.4         |
|                | SKUA-485-27-50-6  | 129           | 7            | 25.5         | 175           | 89.1         | 7.7          |
|                | <b>Mean</b>       | <b>128.83</b> | <b>8.17</b>  | <b>26.83</b> | <b>168.67</b> | <b>87.30</b> | <b>8.63</b>  |
|                | <b>CV (%)</b>     | <b>6.48</b>   | <b>33.23</b> | <b>3.04</b>  | <b>7.99</b>   | <b>2.57</b>  | <b>32.91</b> |
| SKUA-485-27-56 |                   | 132           | 11           | 22           | 100           | 89.0         | 6.9          |
|                | SKUA-485-27-56-1  | 157           | 7            | 24.5         | 115           | 83.5         | 5.0          |
|                | SKUA-485-27-56-2  | 153           | 18           | 25.5         | 109           | 86.2         | 12.3         |
|                | SKUA-485-27-56-3  | 145           | 17           | 27.0         | 197           | 87.8         | 20.9         |
|                | SKUA-485-27-56-4  | 140           | 18           | 26.5         | 105           | 86.7         | 11.8         |
|                | SKUA-485-27-56-5  | 134           | 12           | 22.0         | 103           | 87.4         | 7.7          |
|                | <b>Mean</b>       | <b>145.80</b> | <b>14.40</b> | <b>25.10</b> | <b>125.80</b> | <b>86.32</b> | <b>11.55</b> |
|                | <b>CV (%)</b>     | <b>6.42</b>   | <b>33.52</b> | <b>7.89</b>  | <b>31.85</b>  | <b>1.97</b>  | <b>52.24</b> |
| SKUA-485-27-61 |                   | 140           | 15           | 21           | 85            | 82.9         | 8.0          |
|                | SKUA-485-27-61-1  | 120           | 14           | 25.5         | 101           | 77.2         | 8.8          |
|                | SKUA-485-27-61-2  | 117           | 9            | 17.5         | 85            | 77.8         | 4.8          |
|                | SKUA-485-27-61-3  | 120           | 13           | 13.5         | 90            | 82.5         | 7.3          |
|                | SKUA-485-27-61-4  | 112           | 16           | 16.5         | 92            | 71.4         | 9.2          |
|                | SKUA-485-27-61-5  | 135           | 13           | 23.5         | 109           | 84.4         | 8.9          |
|                | SKUA-485-27-61-6  | 132           | 19           | 19.5         | 102           | 63.5         | 12.1         |
|                | <b>Mean</b>       | <b>122.67</b> | <b>14.00</b> | <b>19.33</b> | <b>96.50</b>  | <b>76.13</b> | <b>8.52</b>  |
|                | <b>CV (%)</b>     | <b>7.29</b>   | <b>23.90</b> | <b>23.23</b> | <b>9.29</b>   | <b>10.10</b> | <b>28.29</b> |
| SKUA-485-27-64 |                   | 135           | 12           | 23.0         | 174           | 64.9         | 13.1         |
|                | SKUA-485-27-64-1  | 139           | 20           | 27.0         | 65            | 84.6         | 8.1          |
|                | SKUA-485-27-64-2  | 156           | 17           | 24.5         | 85            | 82.4         | 9.0          |
|                | SKUA-485-27-64-3  | 158           | 9            | 25.5         | 75            | 84.0         | 4.2          |
|                | SKUA-485-27-64-4  | 145           | 14           | 21.5         | 112           | 83.0         | 9.8          |
|                | SKUA-485-27-64-5  | 148           | 9            | 26.5         | 77            | 88.3         | 4.3          |
|                | SKUA-485-27-64-6  | 141           | 10           | 27.0         | 105           | 93.3         | 6.6          |
|                | SKUA-485-27-64-7  | 137           | 18           | 23.5         | 153           | 85.6         | 17.2         |
|                | SKUA-485-27-64-8  | 134           | 20           | 23.0         | 146           | 87.0         | 18.3         |
|                | SKUA-485-27-64-9  | 144           | 10           | 21.5         | 135           | 88.1         | 8.4          |
|                | SKUA-485-27-64-10 | 141           | 7            | 28.0         | 117           | 90.6         | 5.1          |
|                | <b>Mean</b>       | <b>144.30</b> | <b>13.40</b> | <b>24.80</b> | <b>107.00</b> | <b>86.70</b> | <b>9.11</b>  |
|                | <b>CV (%)</b>     | <b>5.41</b>   | <b>37.26</b> | <b>9.51</b>  | <b>29.09</b>  | <b>4.02</b>  | <b>54.31</b> |
| SKUA-485-27-70 |                   | 117           | 21           | 21           | 197           | 84.3         | 25.9         |
|                | SKUA-485-27-70-1  | 141           | 9            | 3.5          | 144           | 82.6         | 28.1         |
|                | SKUA-485-27-70-2  | 140           | 10           | 27.0         | 143           | 90.2         | 8.9          |
|                | SKUA-485-27-70-3  | 128           | 10           | 24.0         | 137           | 91.2         | 28.6         |
|                | SKUA-485-27-70-4  | 128           | 11           | 23.5         | 170           | 88.8         | 11.7         |
|                | SKUA-485-27-70-5  | 142           | 12           | 24.5         | 165           | 87.3         | 32.4         |
|                | <b>Mean</b>       | <b>135.80</b> | <b>10.40</b> | <b>20.50</b> | <b>151.80</b> | <b>88.04</b> | <b>21.94</b> |
|                | <b>CV (%)</b>     | <b>5.27</b>   | <b>10.96</b> | <b>46.82</b> | <b>9.68</b>   | <b>3.82</b>  | <b>19.67</b> |
| SKUA-485-27-77 |                   | 127           | 20           | 21.0         | 122           | 49.2         | 15.3         |
|                | SKUA-485-27-77-1  | 145           | 17           | 23.5         | 109           | 91.7         | 11.6         |
|                | SKUA-485-27-77-2  | 132           | 21           | 22.0         | 107           | 89.7         | 24.0         |
|                | SKUA-485-27-77-3  | 123           | 19           | 23.0         | 111           | 90.2         | 18.2         |
|                | SKUA-485-27-77-4  | 114           | 22           | 22.5         | 105           | 93.3         | 24.4         |
|                | SKUA-485-27-77-5  | 117           | 18           | 24.0         | 102           | 85.3         | 15.5         |

|                             |                     |               |              |              |               |              |              |
|-----------------------------|---------------------|---------------|--------------|--------------|---------------|--------------|--------------|
|                             | SKUA-485-27-77-6    | 136           | 20           | 25.5         | 101           | 94.1         | 18.6         |
|                             | <b>Mean</b>         | <b>127.83</b> | <b>19.50</b> | <b>23.42</b> | <b>105.83</b> | <b>90.73</b> | <b>18.72</b> |
|                             | <b>CV (%)</b>       | <b>9.33</b>   | <b>9.59</b>  | <b>5.30</b>  | <b>3.70</b>   | <b>3.47</b>  | <b>9.56</b>  |
| SKUA-485-27-78-             |                     | <b>103</b>    | <b>16</b>    | <b>21.0</b>  | <b>112</b>    | <b>65.2</b>  | <b>11.2</b>  |
|                             | SKUA-485-27-78-1    | 125           | 18           | 22.0         | 105           | 88.6         | 11.8         |
|                             | SKUA-485-27-78-2    | 117           | 21           | 23.5         | 112           | 84.8         | 14.7         |
|                             | SKUA-485-27-78-3    | 132           | 19           | 22.5         | 97            | 80.4         | 11.5         |
|                             | SKUA-485-27-78-4    | 114           | 17           | 19.0         | 77            | 81.8         | 8.2          |
|                             | SKUA-485-27-78-5    | 126           | 18           | 19.0         | 45            | 71.1         | 5.1          |
|                             | <b>Mean</b>         | <b>122.80</b> | <b>18.60</b> | <b>21.20</b> | <b>87.20</b>  | <b>81.35</b> | <b>10.26</b> |
|                             | <b>CV (%)</b>       | <b>5.91</b>   | <b>8.15</b>  | <b>9.81</b>  | <b>30.95</b>  | <b>8.02</b>  | <b>36.17</b> |
| SKUA-485-27-81-             |                     | 120           | 17           | 21           | 111           | 81.4         | 11.8         |
|                             | SKUA-485-27-81-1    | 117           | 9            | 22.5         | 133           | 94.7         | 7.5          |
|                             | SKUA-485-27-81-2    | 127           | 6            | 24.0         | 129           | 92.2         | 4.8          |
|                             | SKUA-485-27-81-3    | 124           | 7            | 19.5         | 143           | 91.6         | 6.3          |
|                             | SKUA-485-27-81-4    | 136           | 4            | 23.5         | 137           | 89.2         | 7.2          |
|                             | SKUA-485-27-81-5    | 135           | 10           | 21.5         | 137           | 90.5         | 8.6          |
|                             | SKUA-485-27-81-6    | 115           | 8            | 22.0         | 135           | 93.3         | 6.8          |
|                             | SKUA-485-27-81-7    | 121           | 9            | 21.0         | 143           | 92.3         | 8.0          |
|                             | SKUA-485-27-81-8    | 137           | 25           | 22.5         | 153           | 94.1         | 23.9         |
|                             | <b>Mean</b>         | <b>126.50</b> | <b>9.75</b>  | <b>22.06</b> | <b>139.00</b> | <b>92.26</b> | <b>9.13</b>  |
|                             | <b>CV (%)</b>       | <b>6.89</b>   | <b>66.19</b> | <b>6.46</b>  | <b>5.76</b>   | <b>1.99</b>  | <b>66.58</b> |
| SKUA-485-27-86-             |                     | 113           | 20           | 23.0         | 146           | 80.1         | 18.3         |
|                             | SKUA-485-27-86-1    | 138           | 10           | 22.5         | 139           | 85.5         | 18.7         |
|                             | SKUA-485-27-86-2    | 130           | 11           | 24.5         | 167           | 85.6         | 21.5         |
|                             | SKUA-485-27-86-3    | 123           | 6            | 20.0         | 124           | 79.6         | 14.7         |
|                             | SKUA-485-27-86-4    | 128           | 8            | 25.0         | 118           | 64.6         | 15.9         |
|                             | SKUA-485-27-86-5    | 120           | 8            | 17.5         | 112           | 61.9         | 15.6         |
|                             | SKUA-485-27-86-6    | 114           | 10           | 21.0         | 143           | 74.0         | 28.9         |
|                             | SKUA-485-27-86-7    | 116           | 7            | 20.5         | 125           | 58.2         | 5.5          |
|                             | SKUA-485-27-86-8    | 105           | 16           | 19.5         | 115           | 75.6         | 30.5         |
|                             | SKUA-485-27-86-9    | 130           | 8            | 23.5         | 162           | 71.7         | 18.1         |
|                             | SKUA-485-27-86-10   | 130           | 8            | 23.5         | 135           | 72.3         | 216.8        |
|                             | <b>Mean</b>         | <b>123.40</b> | <b>9.20</b>  | <b>21.75</b> | <b>134.00</b> | <b>72.89</b> | <b>18.71</b> |
|                             | <b>CV (%)</b>       | <b>7.91</b>   | <b>30.66</b> | <b>11.17</b> | <b>14.21</b>  | <b>12.78</b> | <b>31.85</b> |
| <b>DHMAS 70Q<br/>164-2b</b> |                     | <b>104</b>    | <b>13</b>    | <b>15</b>    | <b>108</b>    | <b>61</b>    | <b>8.78</b>  |
| <i>Mushk Budji</i>          |                     | <b>123</b>    | <b>19</b>    | <b>19</b>    | <b>121</b>    | <b>84</b>    | <b>14.37</b> |
|                             | <b>Overall Mean</b> | <b>129.85</b> | <b>13.01</b> | <b>23.18</b> | <b>134.28</b> | <b>86.12</b> | <b>10.68</b> |
|                             | <b>Grand CV (%)</b> | <b>6.12</b>   | <b>26.71</b> | <b>12.14</b> | <b>15.45</b>  | <b>5.32</b>  | <b>33.20</b> |

PH: Plant Height (cm), NT: Number of effective Tillers/ plant, PL: Panicle Length (cm), SP: Spikelets/ Plant, SF: Spikelet Fertility (%), GY: Grain Yield/ plant (g)



**Supplementary Table S6: Kernel traits and cooking quality of BC<sub>1</sub>F<sub>2:3</sub> plants of *Mushk Budji*/DHMAS 70Q 164-1b//*Mushk Budji***

| Plant ID                       |                                | KLBC        | LBR          | KLAC        | KER         | Aroma |
|--------------------------------|--------------------------------|-------------|--------------|-------------|-------------|-------|
| BC <sub>1</sub> F <sub>2</sub> | BC <sub>1</sub> F <sub>3</sub> |             |              |             |             |       |
| SKUA-485-27-13                 |                                | 4.5         | 1.8          | 7.0         | 1.6         | 2     |
|                                | SKUA-485-27-13-1               | 4.8         | 1.7          | 6.7         | 1.4         | 2     |
|                                | SKUA-485-27-13-2               | 4.3         | 1.5          | 6.0         | 1.4         | 0     |
|                                | SKUA-485-27-13-3               | 4.8         | 1.7          | 6.5         | 1.4         | 1     |
|                                | SKUA-485-27-13-4               | 5.0         | 1.7          | 7.0         | 1.4         | 2     |
|                                | SKUA-485-27-13-5               | 4.8         | 1.7          | 6.8         | 1.4         | 1     |
|                                | SKUA-485-27-13-6               | 4.5         | 1.6          | 6.8         | 1.5         | 2     |
|                                | SKUA-485-27-13-7               | 4.5         | 2.3          | 6.6         | 1.5         | 2     |
|                                | SKUA-485-27-13-8               | 5.1         | 2.6          | 7.7         | 1.5         | 0     |
|                                | SKUA-485-27-13-9               | 5.1         | 2.6          | 7.4         | 1.4         | 0     |
|                                | <b>Mean</b>                    | <b>4.75</b> | <b>1.93</b>  | <b>6.83</b> | <b>1.44</b> |       |
|                                | <b>CV (%)</b>                  | <b>6.32</b> | <b>21.19</b> | <b>7.28</b> | <b>3.30</b> |       |
| SKUA-485-27-20                 |                                | 5.0         | 2.5          | 8.2         | 1.64        | 1     |
|                                | SKUA-485-27-20-1               | 4.8         | 1.6          | 6.1         | 1.3         | 0     |
|                                | SKUA-485-27-20-2               | 5.0         | 1.7          | 6.0         | 1.2         | 2     |
|                                | SKUA-485-27-20-3               | 5.1         | 1.7          | 6.6         | 1.3         | 1     |
|                                | SKUA-485-27-20-4               | 4.3         | 1.6          | 5.9         | 1.4         | 0     |
|                                | SKUA-485-27-20-5               | 4.8         | 1.7          | 6.5         | 1.4         | 2     |
|                                | SKUA-485-27-20-6               | 5.1         | 2.0          | 7.0         | 1.4         | 0     |
|                                | SKUA-485-27-20-7               | 5.8         | 1.9          | 7.0         | 1.2         | 1     |
|                                | SKUA-485-27-20-8               | 5.1         | 1.8          | 6.7         | 1.3         | 2     |
|                                | SKUA-485-27-20-9               | 5.1         | 2.0          | 6.7         | 1.3         | 1     |
|                                | SKUA-485-27-20-10              | 5.1         | 1.7          | 6.9         | 1.3         | 1     |
|                                | SKUA-485-27-20-11              | 5.4         | 2.2          | 7.6         | 1.4         | 2     |
|                                | SKUA-485-27-20-12              | 5.1         | 1.7          | 6.9         | 1.3         | 0     |
|                                | SKUA-485-27-20-13              | 5.4         | 1.8          | 7.2         | 1.3         | 2     |
|                                | <b>Mean</b>                    | <b>5.08</b> | <b>1.79</b>  | <b>6.70</b> | <b>1.32</b> |       |
|                                | <b>CV (%)</b>                  | <b>7.07</b> | <b>9.01</b>  | <b>7.29</b> | <b>4.70</b> |       |
| SKUA-485-27-32                 |                                | 4.5         | 1.8          | 7.0         | 1.6         | 2     |
|                                | SKUA-485-27-32-1               | 5.1         | 2.1          | 7.0         | 1.4         | 2     |
|                                | SKUA-485-27-32-2               | 5.0         | 2.0          | 6.8         | 1.4         | 1     |
|                                | SKUA-485-27-32-3               | 5.1         | 2.4          | 7.2         | 1.4         | 1     |
|                                | SKUA-485-27-32-4               | 4.8         | 2.2          | 6.6         | 1.4         | 1     |
|                                | SKUA-485-27-32-5               | 4.8         | 1.9          | 6.8         | 1.4         | 2     |
|                                | SKUA-485-27-32-6               | 5.1         | 2.1          | 7.1         | 1.4         | 2     |
|                                | SKUA-485-27-32-7               | 4.8         | 1.9          | 6.4         | 1.3         | 2     |
|                                | <b>Mean</b>                    | <b>4.95</b> | <b>2.08</b>  | <b>6.84</b> | <b>1.38</b> |       |
|                                | <b>CV (%)</b>                  | <b>3.82</b> | <b>8.94</b>  | <b>4.12</b> | <b>2.08</b> |       |
| SKUA-485-27-43                 |                                | 5.0         | 2.0          | 7.6         | 1.52        | 0     |
|                                | SKUA-485-27-43-1               | 5.8         | 2.9          | 7.2         | 1.3         | 0     |
|                                | SKUA-485-27-43-2               | 5.1         | 2.3          | 6.8         | 1.3         | 0     |
|                                | SKUA-485-27-43-3               | 5.8         | 2.0          | 7.0         | 1.2         | 0     |
|                                | SKUA-485-27-43-4               | 5.1         | 2.0          | 7.0         | 1.4         | 0     |
|                                | SKUA-485-27-43-5               | 5.1         | 1.7          | 6.8         | 1.3         | 0     |
|                                | SKUA-485-27-43-6               | 5.1         | 2.1          | 6.8         | 1.3         | 0     |
|                                | SKUA-485-27-43-7               | 5.4         | 2.2          | 6.8         | 1.3         | 0     |
|                                | SKUA-485-27-43-8               | 5.1         | 1.7          | 7.2         | 1.4         | 0     |
|                                | SKUA-485-27-43-9               | 5.0         | 1.8          | 6.8         | 1.4         | 0     |
|                                | <b>Mean</b>                    | <b>5.28</b> | <b>2.06</b>  | <b>6.93</b> | <b>1.32</b> |       |
|                                | <b>CV (%)</b>                  | <b>5.40</b> | <b>17.51</b> | <b>2.50</b> | <b>4.58</b> |       |
| SKUA-485-27-47                 |                                | 4.5         | 1.8          | 7.0         | 1.56        | 1     |
|                                | SKUA-485-27-47-1               | 4.6         | 1.7          | 7.2         | 1.6         | 2     |
|                                | SKUA-485-27-47-2               | 4.8         | 1.9          | 6.9         | 1.5         | 2     |

|                |                   |              |              |             |             |   |
|----------------|-------------------|--------------|--------------|-------------|-------------|---|
|                | SKUA-485-27-47-3  | 4.5          | 1.7          | 6.5         | 1.4         | 2 |
|                | SKUA-485-27-47-4  | 5.8          | 1.9          | 7.0         | 1.2         | 2 |
|                | SKUA-485-27-47-5  | 4.5          | 1.8          | 6.2         | 1.4         | 2 |
|                | <b>Mean</b>       | <b>4.83</b>  | <b>1.80</b>  | <b>6.76</b> | <b>1.41</b> |   |
|                | <b>CV (%)</b>     | <b>10.93</b> | <b>5.88</b>  | <b>5.97</b> | <b>8.88</b> |   |
| SKUA-485-27-50 |                   | 4.5          | 1.8          | 7.0         | 1.56        | 1 |
|                | SKUA-485-27-50-1  | 5.3          | 2.6          | 6.7         | 1.3         | 0 |
|                | SKUA-485-27-50-2  | 5.5          | 2.8          | 7.2         | 1.3         | 2 |
|                | SKUA-485-27-50-3  | 5.8          | 2.3          | 7.3         | 1.3         | 0 |
|                | SKUA-485-27-50-4  | 5.5          | 2.0          | 7.1         | 1.3         | 1 |
|                | SKUA-485-27-50-5  | 5.3          | 2.0          | 6.9         | 1.3         | 0 |
|                | SKUA-485-27-50-6  | 5.0          | 1.8          | 6.8         | 1.4         | 2 |
|                | <b>Mean</b>       | <b>5.38</b>  | <b>2.25</b>  | <b>7.00</b> | <b>1.30</b> |   |
|                | <b>CV (%)</b>     | <b>4.88</b>  | <b>16.69</b> | <b>3.38</b> | <b>2.52</b> |   |
| SKUA-485-27-56 |                   | 5.0          | 2.5          | 7.8         | 1.56        | 1 |
|                | SKUA-485-27-56-1  | 4.8          | 1.7          | 6.9         | 1.5         | 0 |
|                | SKUA-485-27-56-2  | 4.8          | 1.7          | 6.6         | 1.4         | 0 |
|                | SKUA-485-27-56-3  | 4.3          | 1.7          | 6.8         | 1.6         | 1 |
|                | SKUA-485-27-56-4  | 4.5          | 2.0          | 6.6         | 1.5         | 0 |
|                | <b>Mean</b>       | <b>4.56</b>  | <b>1.79</b>  | <b>6.73</b> | <b>1.48</b> |   |
|                | <b>CV (%)</b>     | <b>5.25</b>  | <b>7.91</b>  | <b>2.23</b> | <b>5.99</b> |   |
| SKUA-485-27-64 |                   | 4.4          | 1.8          | 7.0         | 1.6         | 1 |
|                | SKUA-485-27-64-1  | 5.1          | 2.6          | 7.5         | 1.5         | 1 |
|                | SKUA-485-27-64-2  | 5.0          | 2.0          | 6.7         | 1.3         | 2 |
|                | SKUA-485-27-64-3  | 5.3          | 1.9          | 7.2         | 1.4         | 1 |
|                | SKUA-485-27-64-4  | 5.1          | 2.3          | 7.3         | 1.4         | 1 |
|                | SKUA-485-27-64-5  | 5.3          | 2.6          | 7.2         | 1.4         | 1 |
|                | SKUA-485-27-64-6  | 4.8          | 1.9          | 6.9         | 1.5         | 2 |
|                | SKUA-485-27-64-7  | 5.1          | 2.1          | 7.0         | 1.4         | 1 |
|                | SKUA-485-27-64-8  | 5.0          | 2.0          | 6.9         | 1.4         | 1 |
|                | SKUA-485-27-64-9  | 5.8          | 2.9          | 7.6         | 1.3         | 2 |
|                | SKUA-485-27-64-10 | 5.8          | 2.3          | 7.4         | 1.3         | 1 |
|                | <b>Mean</b>       | <b>5.21</b>  | <b>2.25</b>  | <b>7.17</b> | <b>1.38</b> |   |
|                | <b>CV (%)</b>     | <b>6.09</b>  | <b>15.08</b> | <b>4.06</b> | <b>4.06</b> |   |
| SKUA-485-27-70 |                   | 5.0          | 2.1          | 7.0         | 1.40        | 1 |
|                | SKUA-485-27-70-1  | 5.0          | 2.0          | 7.0         | 1.4         | 0 |
|                | SKUA-485-27-70-2  | 5.4          | 2.4          | 7.0         | 1.3         | 0 |
|                | SKUA-485-27-70-3  | 4.5          | 2.3          | 6.8         | 1.5         | 0 |
|                | SKUA-485-27-70-4  | 5.1          | 2.1          | 7.0         | 1.4         | 0 |
|                | SKUA-485-27-70-5  | 4.8          | 2.1          | 6.5         | 1.4         | 0 |
|                | <b>Mean</b>       | <b>4.95</b>  | <b>2.16</b>  | <b>6.86</b> | <b>1.39</b> |   |
|                | <b>CV (%)</b>     | <b>6.82</b>  | <b>7.34</b>  | <b>3.19</b> | <b>5.52</b> |   |
| SKUA-485-27-77 |                   | 4.5          | 2.3          | 8.4         | 1.9         | 1 |
|                | SKUA-485-27-77-1  | 4.8          | 1.9          | 6.7         | 1.4         | 1 |
|                | SKUA-485-27-77-2  | 5.4          | 2.2          | 7.2         | 1.3         | 0 |
|                | SKUA-485-27-77-3  | 5.3          | 2.1          | 7.2         | 1.4         | 0 |
|                | SKUA-485-27-77-4  | 5.3          | 2.1          | 7.2         | 1.4         | 2 |
|                | SKUA-485-27-77-5  | 5.0          | 2.0          | 6.7         | 1.3         | 1 |
|                | SKUA-485-27-77-6  | 5.4          | 2.4          | 7.1         | 1.3         | 0 |
|                | <b>Mean</b>       | <b>5.17</b>  | <b>2.11</b>  | <b>7.02</b> | <b>1.36</b> |   |
|                | <b>CV (%)</b>     | <b>4.76</b>  | <b>7.82</b>  | <b>3.54</b> | <b>2.36</b> |   |
| SKUA-485-27-78 |                   | 4.5          | 1.8          | 7.0         | 1.6         | 1 |
|                | SKUA-485-27-78-1  | 4.5          | 1.6          | 6.6         | 1.5         | 1 |
|                | SKUA-485-27-78-2  | 4.8          | 1.9          | 6.9         | 1.5         | 0 |
|                | SKUA-485-27-78-3  | 4.5          | 1.6          | 6.8         | 1.5         | 0 |
|                | SKUA-485-27-78-4  | 4.5          | 2.0          | 6.7         | 1.5         | 1 |
|                | SKUA-485-27-78-5  | 4.8          | 2.4          | 6.8         | 1.4         | 0 |
|                | <b>Mean</b>       | <b>4.60</b>  | <b>1.91</b>  | <b>6.76</b> | <b>1.47</b> |   |

|                         |                     |             |              |             |             |          |
|-------------------------|---------------------|-------------|--------------|-------------|-------------|----------|
|                         | <b>CV (%)</b>       | <b>2.98</b> | <b>16.02</b> | <b>1.69</b> | <b>2.11</b> |          |
| SKUA-485-27-81-         |                     | 4.5         | 1.9          | 7.0         | 1.56        | 1        |
|                         | SKUA-485-27-81-1    | 4.5         | 1.6          | 6.8         | 1.5         | 0        |
|                         | SKUA-485-27-81-2    | 5.3         | 1.9          | 7.1         | 1.4         | 1        |
|                         | SKUA-485-27-81-3    | 4.5         | 1.6          | 6.4         | 1.4         | 1        |
|                         | SKUA-485-27-81-4    | 5.0         | 2.0          | 7.1         | 1.4         | 1        |
|                         | SKUA-485-27-81-5    | 4.8         | 2.1          | 6.6         | 1.4         | 2        |
|                         | SKUA-485-27-81-6    | 4.8         | 1.7          | 6.8         | 1.4         | 1        |
|                         | SKUA-485-27-81-7    | 5.0         | 2.0          | 7.0         | 1.4         | 2        |
|                         | SKUA-485-27-81-8    | 5.0         | 2.0          | 6.4         | 1.3         | 2        |
|                         | <b>Mean</b>         | <b>4.84</b> | <b>1.88</b>  | <b>6.78</b> | <b>1.40</b> |          |
|                         | <b>CV (%)</b>       | <b>5.47</b> | <b>9.85</b>  | <b>4.23</b> | <b>4.75</b> |          |
| SKUA-485-27-86-         |                     | 5.0         | 2.0          | 8.6         | 1.7         | 1        |
|                         | SKUA-485-27-86-1    | 4.8         | 1.7          | 7.3         | 1.5         | 0        |
|                         | SKUA-485-27-86-2    | 5.0         | 2.0          | 7.2         | 1.4         | 1        |
|                         | SKUA-485-27-86-3    | 5.0         | 1.8          | 6.7         | 1.3         | 0        |
|                         | SKUA-485-27-86-4    | 5.0         | 2.2          | 6.9         | 1.4         | 0        |
|                         | SKUA-485-27-86-5    | 5.0         | 2.5          | 6.9         | 1.4         | 2        |
|                         | SKUA-485-27-86-6    | 5.0         | 1.8          | 7.1         | 1.4         | 2        |
|                         | SKUA-485-27-86-7    | 4.8         | 1.9          | 6.8         | 1.4         | 0        |
|                         | SKUA-485-27-86-8    | 4.8         | 1.9          | 6.4         | 1.3         | 2        |
|                         | SKUA-485-27-86-9    | 4.8         | 1.7          | 6.8         | 1.4         | 1        |
|                         | SKUA-485-27-86-10   | 5.0         | 1.7          | 6.8         | 1.4         | 0        |
|                         | <b>Mean</b>         | <b>4.90</b> | <b>1.94</b>  | <b>6.89</b> | <b>1.41</b> |          |
|                         | <b>CV (%)</b>       | <b>2.63</b> | <b>12.89</b> | <b>3.78</b> | <b>4.17</b> |          |
| <b>DHMAS 70Q 164-1b</b> |                     | <b>6.5</b>  | <b>2.5</b>   | <b>10.3</b> | <b>1.58</b> | <b>0</b> |
| <i>Mushk Budji</i>      |                     | <b>5.1</b>  | <b>1.6</b>   | <b>7.5</b>  | <b>1.47</b> | <b>2</b> |
|                         | <b>Overall Mean</b> | <b>4.96</b> | <b>2.00</b>  | <b>6.87</b> | <b>1.39</b> |          |
|                         | <b>Grand CV (%)</b> | <b>5.64</b> | <b>11.62</b> | <b>4.00</b> | <b>4.22</b> |          |

KLBC: Kernel Length Before Cooking (mm), LBR: Length Breadth Ratio, KLAC: Kernel Length After Cooking (mm), KER: Kernel Elongation Ratio, Aroma: (0-2 scale)

**Supplementary Table S7: Agronomic performance of BC<sub>2</sub>F<sub>2</sub> plants of *Mushk Budji*/ DHMAS 70Q 164-1b// *Mushk Budji*// *Mushk Budji***

| Plant ID         | PH  | NT | PL   | SP  | SF   | GY   | Decision |
|------------------|-----|----|------|-----|------|------|----------|
| SKUA-485-27-4-   |     |    |      |     |      |      |          |
| SKUA-485-27-4-1  | 106 | 15 | 24.0 | 204 | 82.4 | 23.0 | Selected |
| SKUA-485-27-4-2  | 118 | 15 | 23.5 | 215 | 87.4 | 24.1 | Selected |
| SKUA-485-27-4-3  | 113 | 19 | 24.0 | 68  | 68.9 | 9.6  |          |
| SKUA-485-27-4-4  | 100 | 9  | 22.0 | 138 | 87.0 | 9.3  |          |
| SKUA-485-27-4-5  | 120 | 10 | 18.5 | 164 | 88.1 | 12.3 |          |
| SKUA-485-27-4-6  | 106 | 23 | 24.5 | 293 | 87.4 | 50.5 | Selected |
| SKUA-485-27-4-7  | 125 | 4  | 23.5 | 221 | 87.1 | 6.6  |          |
| SKUA-485-27-4-8  | 130 | 8  | 17.5 | 138 | 91.3 | 8.3  |          |
| SKUA-485-27-4-9  | 100 | 14 | 25.5 | 164 | 78.9 | 17.2 |          |
| SKUA-485-27-4-10 | 115 | 12 | 24.0 | 143 | 74.7 | 12.8 | Selected |
| SKUA-485-27-4-11 | 117 | 5  | 22.0 | 159 | 91.5 | 6.0  |          |
| SKUA-485-27-4-12 | 119 | 9  | 28.0 | 230 | 94.1 | 15.5 |          |
| SKUA-485-27-4-13 | 124 | 11 | -    | -   | -    | -    |          |
| SKUA-485-27-4-14 | 110 | 13 | 22.5 | 161 | 77.1 | 15.6 | Selected |
| SKUA-485-27-4-15 | 122 | 17 | 17.7 | 71  | 59.6 | 9.0  | Selected |
| SKUA-485-27-4-16 | 121 | 11 | 20.0 | 128 | 75.3 | 10.5 |          |
| SKUA-485-27-4-17 | 105 | 10 | 24.5 | 158 | 88.6 | 11.8 |          |
| SKUA-485-27-4-18 | 133 | 27 | 22.5 | 132 | 85.2 | 26.7 |          |
| SKUA-485-27-4-19 | 114 | 13 | 16.5 | 69  | 60.9 | 6.7  | Selected |
| SKUA-485-27-4-20 | 107 | 7  | 20.8 | 128 | 60.0 | 6.7  |          |
| SKUA-485-27-4-21 | 97  | 7  | 25.0 | 159 | 89.6 | 8.3  |          |
| SKUA-485-27-4-22 | 99  | 7  | 27.5 | 168 | 78.6 | 8.8  |          |
| SKUA-485-27-4-23 | 115 | 7  | 21.5 | 200 | 85.0 | 10.5 | Selected |
| SKUA-485-27-4-24 | 106 | 7  | 27.5 | 203 | 85.9 | 10.6 | Selected |
| SKUA-485-27-4-25 | 113 | 7  | 22.5 | 158 | 91.4 | 8.3  |          |
| SKUA-485-27-4-26 | 104 | 10 | 26.0 | 221 | 84.4 | 16.5 |          |
| SKUA-485-27-4-27 | 126 | 7  | 21.5 | 146 | 76.3 | 7.6  | Selected |
| SKUA-485-27-4-28 | 124 | 10 | 22.5 | 278 | 96.2 | 20.8 |          |
| SKUA-485-27-4-29 | 117 | 7  | 22.5 | 167 | 81.1 | 8.7  |          |
| SKUA-485-27-4-30 | 97  | 9  | 27.5 | 230 | 96.1 | 15.5 |          |
| SKUA-485-27-4-31 | 113 | 8  | 20.5 | 86  | 87.7 | 5.1  |          |
| SKUA-485-27-4-32 | 118 | 8  | 27.0 | 203 | 85.2 | 12.2 | Selected |
| SKUA-485-27-4-33 | 131 | 11 | 23.5 | 158 | 78.6 | 13.0 | Selected |
| SKUA-485-27-4-34 | 116 | 11 | 17.5 | 213 | 86.6 | 17.6 |          |
| SKUA-485-27-4-35 | 125 | 11 | 23.5 | 221 | 89.8 | 18.2 |          |
| SKUA-485-27-4-36 | 121 | 8  | 16.5 | 203 | 92.6 | 12.2 |          |
| SKUA-485-27-4-37 | 129 | 10 | 19.5 | 146 | 85.6 | 10.9 |          |
| SKUA-485-27-4-38 | 123 | 16 | 19.0 | 80  | 82.3 | 9.5  | Selected |
| SKUA-485-27-4-39 | 107 | 4  | 13.7 | 71  | 76.6 | 2.1  |          |
| SKUA-485-27-4-40 | 114 | 9  | 17.5 | 65  | 80.0 | 7.4  | Selected |
| SKUA-485-27-4-41 | 127 | 5  | 20.0 | 105 | 87.1 | 3.9  |          |
| SKUA-485-27-4-42 | 126 | 4  | 18.5 | 101 | 79.1 | 3.0  |          |
| SKUA-485-27-4-43 | 112 | 4  | 19.5 | 74  | 63.3 | 2.2  |          |
| SKUA-485-27-4-44 | 130 | 5  | 20.5 | 134 | 88.8 | 5.0  |          |
| SKUA-485-27-4-45 | 129 | 5  | 23.5 | 276 | 92.9 | 10.4 |          |
| SKUA-485-27-4-46 | 110 | 6  | 24.5 | 269 | 87.2 | 12.1 |          |
| SKUA-485-27-4-47 | 114 | 10 | 25.5 | 278 | 84.1 | 20.8 |          |
| SKUA-485-27-4-48 | 112 | 12 | 19.0 | 293 | 96.9 | 26.3 |          |

|                    |               |              |              |              |              |              |          |
|--------------------|---------------|--------------|--------------|--------------|--------------|--------------|----------|
| SKUA-485-27-4-49   | 113           | 5            | 23.5         | 179          | 94.1         | 6.7          |          |
| SKUA-485-27-4-50   | 107           | 6            | 24.5         | 158          | 77.1         | 7.1          | Selected |
| SKUA-485-27-4-51   | 122           | 9            | 20.0         | 161          | 86.9         | 10.8         |          |
| SKUA-485-27-4-52   | 122           | 9            | 20.5         | 171          | 82.5         | 11.5         | Selected |
| SKUA-485-27-4-53   | 95            | 6            | 14.5         | 164          | 86.2         | 7.4          |          |
| SKUA-485-27-4-54   | 127           | 7            | 24.5         | 159          | 82.1         | 8.3          | Selected |
| SKUA-485-27-4-55   | 103           | 9            | 19.5         | 168          | 83.0         | 11.3         |          |
| SKUA-485-27-4-56   | 122           | 7            | 20.0         | 131          | 88.5         | 6.9          |          |
| SKUA-485-27-4-57   | 120           | 15           | 15.5         | 218          | 83.4         | 24.5         | Selected |
| SKUA-485-27-4-58   | 137           | 10           | 22.0         | 203          | 81.5         | 15.2         | Selected |
| SKUA-485-27-4-59   | 105           | 5            | 22.5         | 143          | 82.1         | 5.3          |          |
| SKUA-485-27-4-60   | 103           | 5            | 24.0         | 221          | 87.1         | 8.3          |          |
| SKUA-485-27-4-61   | 121           | 6            | 20.5         | 132          | 77.3         | 5.9          | Selected |
| SKUA-485-27-4-62   | 121           | 4            | 20.5         | 98           | 81.5         | 2.9          |          |
| SKUA-485-27-4-63   | 123           | 7            | 16.6         | 68           | 66.7         | 3.5          |          |
| SKUA-485-27-4-64   | 110           | 4            | 20.0         | 221          | 93.9         | 6.6          |          |
| SKUA-485-27-4-65   | 128           | 4            | 25.5         | 288          | 90.1         | 8.6          |          |
| SKUA-485-27-4-66   | 129           | 4            | 22.2         | 165          | 90.0         | 5.0          |          |
| SKUA-485-27-4-67   | 124           | 4            | 24.5         | 296          | 92.4         | 8.9          |          |
| SKUA-485-27-4-68   | 116           | 6            | 23.5         | 293          | 96.4         | 13.2         |          |
| SKUA-485-27-4-69   | 104           | 7            | 23.5         | 218          | 91.0         | 11.4         |          |
| SKUA-485-27-4-70   | 132           | 3            | 21.0         | 206          | 92.0         | 4.6          |          |
| SKUA-485-27-4-71   | 107           | 4            | 26.5         | 170          | 91.2         | 5.1          |          |
| SKUA-485-27-4-72   | 106           | 5            | 23.5         | 231          | 92.9         | 8.7          |          |
| SKUA-485-27-4-73   | 109           | 6            | 19.5         | 158          | 81.0         | 7.1          |          |
| SKUA-485-27-4-74   | 97            | 3            | 20.5         | 116          | 84.4         | 2.6          |          |
| SKUA-485-27-4-75   | 106           | 7            | 17.5         | 99           | 78.8         | 5.2          |          |
| SKUA-485-27-4-76   | 132           | 5            | 19.5         | 110          | 67.1         | 4.1          |          |
| SKUA-485-27-4-77   | 107           | 7            | 15.0         | 80           | 81.1         | 4.2          |          |
| SKUA-485-27-4-78   | 115           | 10           | 24.5         | 168          | 80.4         | 12.6         |          |
| SKUA-485-27-4-79   | 158           | 13           | 19.5         | 83           | 60.0         | 8.0          | Selected |
| SKUA-485-27-4-80   | 136           | 5            | 23.5         | 168          | 81.3         | 6.3          |          |
| SKUA-485-27-4-81   | 121           | 9            | 26.0         | 233          | 91.0         | 15.7         |          |
| SKUA-485-27-4-82   | 120           | 6            | 14.5         | 146          | 88.7         | 6.5          |          |
| SKUA-485-27-4-83   | 122           | 9            | 19.0         | 231          | 70.8         | 15.6         |          |
| SKUA-485-27-4-84   | 130           | 5            | 22.5         | 296          | 93.4         | 11.1         |          |
| SKUA-485-27-4-85   | 132           | 12           | 21.5         | 285          | 94.2         | 25.7         |          |
| SKUA-485-27-4-86   | 119           | 6            | 20.5         | 180          | 90.8         | 8.1          |          |
| SKUA-485-27-4-87   | 110           | 6            | 109.0        | 155          | 79.6         | 7.0          | Selected |
| SKUA-485-27-4-88   | 134           | 7            | 17.5         | 161          | 82.2         | 8.4          |          |
| SKUA-485-27-4-89   | 107           | 7            | 19.5         | 168          | 83.9         | 8.8          |          |
| SKUA-485-27-4-90   | 114           | 5            | 15.0         | 137          | 73.6         | 5.1          |          |
| SKUA-485-27-4-91   | 121           | 8            | 24.5         | 128          | 83.5         | 7.7          |          |
| SKUA-485-27-4-92   | 110           | 5            | 19.5         | 171          | 79.8         | 6.4          |          |
| SKUA-485-27-4-93   | 121           | 7            | 23.5         | 128          | 75.3         | 6.7          |          |
| SKUA-485-27-4-94   | 120           | 9            | 26.0         | 174          | 88.8         | 11.7         |          |
| SKUA-485-27-4-95   | 109           | 7            | 14.5         | 132          | 85.2         | 6.9          |          |
| SKUA-485-27-4-96   | 149           | 9            | 19.0         | 170          | 89.4         | 11.4         |          |
| SKUA-485-27-4-97   | 125           | 9            | 22.5         | 153          | 87.3         | 10.3         |          |
| SKUA-485-27-4-98   | 117           | 18           | 21.5         | 176          | 90.6         | 23.7         |          |
| <b>Family mean</b> | <b>117.22</b> | <b>8.45</b>  | <b>22.36</b> | <b>170</b>   | <b>83.43</b> | <b>10.77</b> |          |
|                    | <b>±1.92</b>  | <b>±0.73</b> | <b>±1.66</b> | <b>±9.82</b> | <b>±1.89</b> | <b>±1.16</b> |          |
| <b>CV (%)</b>      | <b>9.68</b>   | <b>49.67</b> | <b>42.46</b> | <b>35</b>    | <b>10.67</b> | <b>65.40</b> |          |

|                    |               |              |              |               |              |              |          |
|--------------------|---------------|--------------|--------------|---------------|--------------|--------------|----------|
| SKUA-485-27-7-     |               |              |              |               |              |              |          |
| SKUA-485-27-7-1    | 113           | 13           | 17.5         | 170           | 81.4         | 16.5         |          |
| SKUA-485-27-7-2    | 125           | 15           | 14.0         | 198           | 86.4         | 22.3         |          |
| SKUA-485-27-7-3    | 134           | 13           | 27.0         | 195           | 90.0         | 19.0         | Selected |
| SKUA-485-27-7-4    | 132           | 14           | 27.0         | 218           | 82.1         | 22.8         |          |
| SKUA-485-27-7-5    | 126           | 10           | 27.0         | 180           | 80.8         | 13.5         | Selected |
| SKUA-485-27-7-6    | 114           | 13           | 15.7         | 218           | 85.5         | 21.2         |          |
| SKUA-485-27-7-7    | 125           | 16           | 15.0         | 105           | 74.3         | 12.6         |          |
| SKUA-485-27-7-8    | 127           | 10           | 18.5         | 90            | 66.7         | 6.8          | Selected |
| SKUA-485-27-7-9    | 129           | 11           | 45.0         | 240           | 93.8         | 19.8         | Selected |
| SKUA-485-27-7-10   | 114           | 15           | 16.5         | 200           | 84.2         | 22.4         |          |
| SKUA-485-27-7-11   | 125           | 14           | 45.0         | 231           | 93.5         | 24.3         | Selected |
| SKUA-485-27-7-12   | 121           | 14           | 16.3         | 168           | 77.7         | 17.6         | Selected |
| SKUA-485-27-7-13   | 114           | 13           | 15.7         | 218           | 85.5         | 21.2         | Selected |
| SKUA-485-27-7-14   | 125           | 16           | 15.0         | 105           | 74.3         | 12.6         | Selected |
| SKUA-485-27-7-15   | 121           | 11           | 17.5         | 158           | 77.1         | 13.0         | Selected |
| SKUA-485-27-7-16   | 114           | 8            | 18.5         | 81            | 81.5         | 4.9          |          |
| SKUA-485-27-7-17   | 114           | 12           | 22.0         | 120           | 77.5         | 10.8         | Selected |
| SKUA-485-27-7-18   | 112           | 16           | 27.5         | 288           | 89.1         | 34.6         |          |
| SKUA-485-27-7-19   | 143           | 13           | 22.5         | 173           | 92.2         | 16.8         |          |
| SKUA-485-27-7-20   | 112           | 18           | 27.5         | 171           | 81.6         | 23.1         |          |
| SKUA-485-27-7-21   | 143           | 12           | 23.5         | 173           | 86.1         | 15.5         |          |
| SKUA-485-27-7-22   | 114           | 13           | 24.0         | 81            | 77.8         | 7.9          |          |
| SKUA-485-27-7-23   | 154           | 9            | 25.5         | 264           | 85.5         | 17.8         |          |
| SKUA-485-27-7-24   | 104           | 9            | 22.5         | 203           | 88.9         | 13.7         |          |
| SKUA-485-27-7-25   | 135           | 8            | 20.0         | 83            | 60.0         | 5.0          | Selected |
| SKUA-485-27-7-26   | 114           | 9            | 18.0         | 81            | 77.8         | 5.5          | Selected |
| SKUA-485-27-7-27   | 154           | 10           | 25.5         | 270           | 86.1         | 20.3         |          |
| SKUA-485-27-7-28   | 104           | 9            | 22.5         | 203           | 91.9         | 13.7         |          |
| SKUA-485-27-7-29   | 97            | 6            | 23.5         | 249           | 86.1         | 11.2         |          |
| SKUA-485-27-7-30   | 123           | 11           | 25.6         | 231           | 85.1         | 19.1         |          |
| SKUA-485-27-7-31   | 133           | 6            | 13.0         | 96            | 67.2         | 4.3          | Selected |
| SKUA-485-27-7-32   | 104           | 9            | 22.5         | 203           | 91.9         | 13.7         |          |
| SKUA-485-27-7-33   | 123           | 10           | 21.5         | 180           | 89.2         | 13.5         | Selected |
| SKUA-485-27-7-34   | 125           | 17           | 16.0         | 105           | 74.3         | 13.4         |          |
| SKUA-485-27-7-35   | 144           | 8            | 26.5         | 270           | 86.7         | 16.2         | Selected |
| SKUA-485-27-7-36   | 104           | 9            | 35.0         | 165           | 89.1         | 11.1         | Selected |
| SKUA-485-27-7-37   | 104           | 14           | 28.5         | 248           | 85.5         | 26.0         |          |
| SKUA-485-27-7-38   | 117           | 12           | 21.5         | 120           | 76.3         | 10.8         | Selected |
| SKUA-485-27-7-39   | 112           | 16           | 27.5         | 288           | 89.1         | 34.6         |          |
| SKUA-485-27-7-40   | 143           | 13           | 22.5         | 173           | 92.2         | 16.8         |          |
| <b>Family mean</b> | <b>122.28</b> | <b>11.88</b> | <b>22.90</b> | <b>180</b>    | <b>83.04</b> | <b>16.14</b> |          |
|                    | <b>±2.31</b>  | <b>±0.58</b> | <b>±1.21</b> | <b>±10.87</b> | <b>±1.18</b> | <b>±2.57</b> |          |
| <b>CV (%)</b>      | <b>11.43</b>  | <b>25.53</b> | <b>31.10</b> | <b>35</b>     | <b>9.34</b>  | <b>43.92</b> |          |
| SKUA-485-27-8-     |               |              |              |               |              |              |          |
| SKUA-485-27-8-1    | 123           | 12           | 25           | 213           | 91.5         | 19.2         | Selected |
| SKUA-485-27-8-2    | 116           | 10           | 23           | 185           | 82.1         | 13.8         |          |
| SKUA-485-27-8-3    | 114           | 9            | 18           | 81            | 77.8         | 15.5         | Selected |
| SKUA-485-27-8-4    | 145           | 13           | 19           | 158           | 78.1         | 15.4         |          |
| SKUA-485-27-8-5    | 156           | 16           | 22.5         | 158           | 91.4         | 18.9         | Selected |
| SKUA-485-27-8-6    | 104           | 13           | 27.5         | 263           | 85.7         | 25.6         |          |
| SKUA-485-27-8-7    | 154           | 10           | 25.5         | 270           | 86.1         | 20.3         | Selected |
| SKUA-485-27-8-8    | 104           | 9            | 22.5         | 203           | 91.9         | 13.7         | Selected |

|                           |               |              |              |              |              |              |          |
|---------------------------|---------------|--------------|--------------|--------------|--------------|--------------|----------|
| SKUA-485-27-8-9           | 97            | 6            | 23.5         | 249          | 86.1         | 11.2         | Selected |
| SKUA-485-27-8-10          | 100           | 7            | 21           | 176          | 81.2         | 9.2          |          |
| SKUA-485-27-8-11          | 108           | 13           | 18.5         | 116          | 87.0         | 11.3         | Selected |
| SKUA-485-27-8-12          | 134           | 18           | 15.5         | 99           | 77.3         | 13.4         | Selected |
| SKUA-485-27-8-13          | 144           | 23           | 21.3         | 218          | 82.1         | 37.5         | Selected |
| SKUA-485-27-8-14          | 104           | 22           | 27           | 221          | 88.4         | 36.4         |          |
| SKUA-485-27-8-15          | 117           | 13           | 19           | 98           | 58.5         | 9.5          |          |
| SKUA-485-27-8-16          | 121           | 14           | 25.5         | 203          | 85.9         | 21.3         |          |
| SKUA-485-27-8-17          | 116           | 13           | 27.5         | 198          | 90.9         | 19.3         |          |
| SKUA-485-27-8-18          | 125           | 16           | 25           | 161          | 87.9         | 19.3         |          |
| SKUA-485-27-8-19          | 121           | 11           | 25.5         | 233          | 86.5         | 19.2         |          |
| SKUA-485-27-8-20          | 108           | 13           | 25.5         | 239          | 94.3         | 23.3         |          |
| SKUA-485-27-8-21          | 135           | 8            | 28           | 233          | 89.0         | 14.0         |          |
| SKUA-485-27-8-22          | 138           | 9            | 23           | 209          | 90.6         | 14.1         |          |
| SKUA-485-27-8-23          | 133           | 8            | 22.5         | 188          | 88.8         | 11.3         |          |
| SKUA-485-27-8-24          | 123           | 11           | 21.5         | 135          | 86.7         | 11.1         |          |
| SKUA-485-27-8-25          | 145           | 8            | 23.5         | 165          | 89.1         | 9.9          |          |
| SKUA-485-27-8-26          | 123           | 11           | 22.5         | 113          | 74.7         | 9.3          |          |
| SKUA-485-27-8-27          | 127           | 11           | 17           | 68           | 57.8         | 5.6          |          |
| SKUA-485-27-8-28          | 121           | 19           | 24.5         | 174          | 81.0         | 24.8         | Selected |
| SKUA-485-27-8-29          | 128           | 19           | 22           | 158          | 82.9         | 22.4         |          |
| SKUA-485-27-8-30          | 122           | 12           | 21.5         | 233          | 88.4         | 20.9         |          |
| SKUA-485-27-8-31          | 117           | 15           | 22           | 249          | 91.0         | 28.0         |          |
| SKUA-485-27-8-32          | 124           | 14           | 20           | 203          | 88.1         | 21.3         |          |
| SKUA-485-27-8-33          | 122           | 17           | 19.5         | 182          | 88.4         | 23.1         |          |
| SKUA-485-27-8-34          | 107           | 12           | 19           | 171          | 89.5         | 15.4         |          |
| SKUA-485-27-8-35          | 133           | 14           | 27           | 215          | 85.3         | 22.5         |          |
| SKUA-485-27-8-36          | 137           | 7            | 28           | 239          | 85.5         | 12.5         |          |
| SKUA-485-27-8-37          | 133           | 8            | 26.5         | 198          | 83.3         | 11.9         |          |
| <b>Family mean</b>        | <b>123.76</b> | <b>12.54</b> | <b>22.86</b> | <b>185</b>   | <b>84.62</b> | <b>17.59</b> |          |
|                           | <b>±2.5</b>   | <b>±0.66</b> | <b>±0.54</b> | <b>±8.67</b> | <b>±1.35</b> | <b>±1.30</b> |          |
| <b>CV (%)</b>             | <b>11.84</b>  | <b>33.02</b> | <b>14.42</b> | <b>28</b>    | <b>9.27</b>  | <b>43.02</b> |          |
| <b>DHMAS 70Q 164-1b</b>   | <b>104</b>    | <b>13</b>    | <b>15</b>    | <b>108</b>   | <b>61</b>    | <b>8.78</b>  |          |
| <b><i>Mushk Budji</i></b> | <b>123</b>    | <b>19</b>    | <b>19</b>    | <b>121</b>   | <b>84</b>    | <b>14.37</b> |          |

PH: Plant Height (cm), NT: Number of effective Tillers/ plant, PL: Panicle Length (cm), SP: Spikelets/ Plant, SF: Spikelet Fertility (%), GY: Grain Yield/ plant (g)

**Supplementary Table S8: Marker-assisted foreground selection, evaluation for kernel traits and cooking quality of selected BC<sub>2</sub>F<sub>2</sub> progenies**

| Plant ID         | KLBC              | KBBC              | LBR               | KLAC              | KER               | Aroma | Gene status |            |             |
|------------------|-------------------|-------------------|-------------------|-------------------|-------------------|-------|-------------|------------|-------------|
|                  |                   |                   |                   |                   |                   |       | <i>Pita</i> | <i>Pil</i> | <i>Pi54</i> |
| SKUA-485-27-4-   |                   |                   |                   |                   |                   |       | <i>Pita</i> | <i>Pil</i> | <i>Pi54</i> |
| SKUA-485-27-4-1  | 5.0               | 3.3               | 1.5               | 8.7               | 1.7               | 2     | B           | H          | -           |
| SKUA-485-27-4-2  | 5.3               | 3.2               | 1.7               | 7.2               | 1.3               | 1     | B           | H          | -           |
| SKUA-485-27-4-6  | 5.0               | 2.3               | 2.1               | 8.2               | 1.6               | 1     | B           | H          | -           |
| SKUA-485-27-4-10 | 4.5               | 2.7               | 1.7               | 8.0               | 1.8               | 1     | B           | H          | -           |
| SKUA-485-27-4-14 | 5.0               | 2.7               | 1.9               | 8.7               | 1.7               | 0     | B           | H          | -           |
| SKUA-485-27-4-15 | 5.0               | 3.5               | 1.4               | 7.3               | 1.5               | 0     | A           | B          | -           |
| SKUA-485-27-4-19 | 5.5               | 3.2               | 1.7               | 8.3               | 1.5               | 2     | B           | H          | -           |
| SKUA-485-27-4-23 | 5.5               | 3.5               | 1.6               | 7.8               | 1.4               | 2     | B           | -          | -           |
| SKUA-485-27-4-24 | 5.0               | 3.2               | 1.6               | 8.2               | 1.6               | 1     | A           | -          | -           |
| SKUA-485-27-4-27 | 4.5               | 3.5               | 1.3               | 7.7               | 1.7               | 1     | A           | A          | -           |
| SKUA-485-27-4-32 | 5.5               | 3.2               | 1.7               | 8.0               | 1.5               | 2     | B           | H          | -           |
| SKUA-485-27-4-33 | 5.5               | 3.3               | 1.7               | 7.5               | 1.4               | 1     | A           | -          | -           |
| SKUA-485-27-4-38 | 4.5               | 3.3               | 1.4               | 8.0               | 1.8               | 2     | B           | B          | B           |
| SKUA-485-27-4-40 | 5.5               | 3.3               | 1.7               | 8.2               | 1.5               | 2     | B           | B          | B           |
| SKUA-485-27-4-50 | 5.5               | 3.3               | 1.7               | 8.2               | 1.5               | 2     | A           | A          | -           |
| SKUA-485-27-4-52 | 5.0               | 3.5               | 1.4               | 8.7               | 1.7               | 0     | B           | A          | -           |
| SKUA-485-27-4-54 | 5.5               | 3.5               | 1.6               | 8.2               | 1.5               | 0     | A           | -          | -           |
| SKUA-485-27-4-57 | 5.5               | 3.2               | 1.7               | 7.7               | 1.4               | 0     | A           | B          | -           |
| SKUA-485-27-4-58 | 5.5               | 3.3               | 1.7               | 7.9               | 1.4               | 1     | A           | B          | -           |
| SKUA-485-27-4-61 | 5.5               | 3.0               | 1.8               | 8.2               | 1.5               | 2     | A           | H          | -           |
| SKUA-485-27-4-79 | 5.5               | 3.2               | 1.7               | 8.0               | 1.5               | 1     | A           | H          | -           |
| SKUA-485-27-4-87 | 5.5               | 3.3               | 1.7               | 7.5               | 1.4               | 1     | A           | H          | -           |
| <b>Mean</b>      | <b>5.22 ±0.07</b> | <b>3.20 ±0.05</b> | <b>1.64 ±0.03</b> | <b>8.00 ±0.08</b> | <b>1.54 ±0.03</b> |       |             |            |             |
| <b>CV (%)</b>    | <b>6.99</b>       | <b>9.49</b>       | <b>11.27</b>      | <b>5.11</b>       | <b>9.47</b>       |       |             |            |             |



| <b>Plant ID</b>  | <b>KLBC</b>       | <b>KBBC</b>       | <b>LBR</b>        | <b>KLAC</b>       | <b>KER</b>        | <b>Aroma</b> | <b>Gene status</b> |            |             |
|------------------|-------------------|-------------------|-------------------|-------------------|-------------------|--------------|--------------------|------------|-------------|
|                  |                   |                   |                   |                   |                   |              | <i>Pita</i>        | <i>Pil</i> | <i>Pi54</i> |
| SKUA-485-27-7-   |                   |                   |                   |                   |                   |              | A                  | B          | -           |
| SKUA-485-27-7-3  | 5.0               | 3.0               | 1.7               | 8.2               | 1.6               | 2            | A                  | B          | -           |
| SKUA-485-27-7-5  | 4.8               | 2.0               | 2.4               | 9.2               | 1.9               | 1            | A                  | A          | -           |
| SKUA-485-27-7-8  | 5.3               | 2.2               | 2.5               | 7.7               | 1.4               | 2            | A                  | H          | -           |
| SKUA-485-27-7-9  | 4.2               | 2.2               | 1.9               | 7.3               | 1.8               | 1            | A                  | B          | -           |
| SKUA-485-27-7-11 | 5.2               | 2.2               | 2.4               | 7.2               | 1.4               | 1            | A                  | A          | -           |
| SKUA-485-27-7-12 | 5.0               | 2.5               | 2.0               | 8.2               | 1.6               | 1            | A                  | H          | -           |
| SKUA-485-27-7-13 | 5.0               | 3.0               | 1.7               | 7.3               | 1.5               | 2            | B                  | H          | -           |
| SKUA-485-27-7-14 | 4.5               | 2.0               | 2.3               | 7.2               | 1.6               | 1            | A                  | A          | -           |
| SKUA-485-27-7-15 | 5.0               | 2.5               | 2.0               | 7.8               | 1.6               | 2            | B                  | H          | -           |
| SKUA-485-27-7-17 | 5.5               | 3.0               | 1.8               | 9.2               | 1.7               | 1            | B                  | H          | -           |
| SKUA-485-27-7-25 | 5.0               | 3.0               | 1.7               | 7.7               | 1.5               | 2            | A                  | H          | -           |
| SKUA-485-27-7-26 | 5.3               | 3.0               | 1.8               | 8.5               | 1.6               | 2            | B                  | A          | -           |
| SKUA-485-27-7-31 | 5.0               | 2.5               | 2.0               | 7.5               | 1.5               | 2            | A                  | H          | -           |
| SKUA-485-27-7-33 | 5.0               | 3.0               | 1.7               | 7.8               | 1.6               | 2            | A                  | H          | -           |
| SKUA-485-27-7-35 | 5.0               | 2.5               | 2.0               | 7.3               | 1.5               | 1            | B                  | H          | -           |
| SKUA-485-27-7-36 | 5.0               | 3.0               | 1.7               | 7.5               | 1.5               | 2            | A                  | A          | -           |
| SKUA-485-27-7-38 | 5.3               | 3.0               | 1.8               | 8.7               | 1.7               | 2            | A                  | A          | -           |
| <b>Mean</b>      | <b>5.00 ±0.06</b> | <b>2.62 ±0.10</b> | <b>1.95 ±0.07</b> | <b>7.89 ±0.16</b> | <b>1.58 ±0.03</b> |              |                    |            |             |
| <b>CV (%)</b>    | <b>6.10</b>       | <b>15.39</b>      | <b>14.43</b>      | <b>8.24</b>       | <b>7.92</b>       |              |                    |            |             |

| Plant ID                | KLBC              | KBBC              | LBR               | KLAC              | KER               | Aroma    | Gene status |            |             |
|-------------------------|-------------------|-------------------|-------------------|-------------------|-------------------|----------|-------------|------------|-------------|
|                         |                   |                   |                   |                   |                   |          | <i>Pita</i> | <i>Pil</i> | <i>Pi54</i> |
| SKUA-485-27-8-          |                   |                   |                   |                   |                   |          | B           | A          | -           |
| SKUA-485-27-8-1         | 4.3               | 3.0               | 1.4               | 7.7               | 1.8               | 2        | B           | A          | -           |
| SKUA-485-27-8-3         | 5.0               | 2.5               | 2.0               | 8.3               | 1.7               | 1        | B           | B          | B           |
| SKUA-485-27-8-5         | 4.3               | 2.7               | 1.6               | 7.5               | 1.7               | 2        | B           | -          | -           |
| SKUA-485-27-8-7         | 4.5               | 2.2               | 2.1               | 7.7               | 1.7               | 1        | B           | A          | -           |
| SKUA-485-27-8-8         | 4.5               | 2.7               | 1.7               | 7.8               | 1.7               | 0        | A           | A          | -           |
| SKUA-485-27-8-9         | 4.7               | 2.7               | 1.8               | 8.3               | 1.8               | 1        | B           | A          | -           |
| SKUA-485-27-8-11        | 4.3               | 2.0               | 2.2               | 8.0               | 1.8               | 2        | B           | A          | -           |
| SKUA-485-27-8-12        | 5.0               | 3.2               | 1.6               | 8.7               | 1.7               | 0        | A           | A          | -           |
| SKUA-485-27-8-13        | 4.7               | 2.3               | 2.0               | 8.2               | 1.8               | 0        | B           | A          | -           |
| SKUA-485-27-8-28        | 4.7               | 3.0               | 1.6               | 7.7               | 1.6               | 1        | A           | A          | -           |
| <b>Mean</b>             | <b>4.59 ±0.08</b> | <b>2.62 ±0.12</b> | <b>1.79 ±0.08</b> | <b>7.98 ±0.33</b> | <b>1.74 ±0.02</b> |          |             |            |             |
| <b>CV (%)</b>           | <b>5.70</b>       | <b>14.42</b>      | <b>14.34</b>      | <b>4.77</b>       | <b>3.52</b>       |          |             |            |             |
| <b>DHMAS 70Q 164-1b</b> | <b>6.5</b>        | <b>2.6</b>        | <b>2.5</b>        | <b>10.3</b>       | <b>1.58</b>       | <b>0</b> |             |            |             |
| <i>Mushk Budji</i>      | <b>5.1</b>        | <b>3.2</b>        | <b>1.6</b>        | <b>7.5</b>        | <b>1.47</b>       | <b>2</b> |             |            |             |

KLBC: Kernel Length Before Cooking (mm), KBBC: Kernel Breadth Before Cooking, LBR: Length Breadth Ratio, KLAC: Kernel Length After Cooking (mm), KER: Kernel Elongation Ratio, Aroma: (0-2 scale), A: Recipient parent allele, B: Donor Parent allele

**Supplementary Table S9. Fold-change in protein expression under 2D gel electrophoresis of three-gene pyramided as compared to donor line DHMAS 70Q 164-1b**

| <b>Protein Name</b>       | <b>Match ID</b> | <b>Max</b> | <b>Fold</b> | <b>Match Count</b> | <b>Mushk Budji</b> | <b>SKUA-485-27-4-38-4</b> | <b>SKUA-485-27-4-40-6</b> | <b>DHMAS 70Q 164-1b</b> | <b>ANOVA</b> |
|---------------------------|-----------------|------------|-------------|--------------------|--------------------|---------------------------|---------------------------|-------------------------|--------------|
| Alpha-amylase             | 33              | 0.75007    | 1.82084     | 4                  | 0.75007            | 0.70812                   | 0.74073                   | 0.41193                 | 0.00467      |
| Triosephosphate isomerase | 47              | 1.41549    | 16.53680    | 4                  | 0.30501            | 0.30613                   | 1.41549                   | 0.08560                 | 0.00009      |
| 19 kDa globulin           | 109             | 0.80443    | 8.06367     | 4                  | 0.42705            | 0.29868                   | 0.80443                   | 0.09976                 | 0.00249      |
| S-(+)-linalool synthase   | 133             | 0.50076    | 1.81634     | 3                  | 0.50076            | 0.33239                   | 0.27570                   | -                       | 0.00000      |

**Supplementary Table S10. Grain yield performance of pyramided lines across different locations of Kashmir valley**

| S. No. | Line ID                      | Grain yield (t/ha) (GY) |                |                |                |                |           |
|--------|------------------------------|-------------------------|----------------|----------------|----------------|----------------|-----------|
|        |                              | E <sub>1</sub>          | E <sub>2</sub> | E <sub>3</sub> | E <sub>4</sub> | E <sub>5</sub> | Mean      |
| 1      | SKUA-485-27-50-5-5           | 3.23                    | 3.02           | 2.98           | 2.74           | 2.81           | 2.96±0.09 |
| 2      | SKUA-485-27-20-6-4           | 5.13                    | 4.68           | 4.12           | 3.74           | 3.03           | 4.14±0.36 |
| 3      | SKUA-485-27-13-1-3           | 3.85                    | 3.52           | 2.98           | 3.33           | 2.86           | 3.31±0.18 |
| 4      | SKUA-485-27-86-10-4          | 5.95                    | 4.93           | 4.63           | 4.38           | 4.40           | 4.86±0.29 |
| 5      | SKUA-485-27-77-6-2           | 5.61                    | 5.12           | 4.62           | 4.25           | 4.16           | 4.75±0.27 |
| 6      | SKUA-485-27-47-4-1           | 4.21                    | 5.34           | 5.21           | 4.61           | 4.82           | 4.84±0.20 |
| 7      | SKUA-485-27-3-7-5            | 5.34                    | 5.26           | 4.38           | 4.13           | 3.00           | 4.42±0.43 |
| 8      | SKUA-485-27-4-38-4           | 5.51                    | 5.56           | 5.24           | 4.20           | 3.33           | 4.77±0.44 |
| 9      | SKUA-485-27-4-40-6           | 5.62                    | 5.40           | 4.70           | 4.54           | 3.89           | 4.83±0.31 |
| 10     | Mushk Budji                  | 5.12                    | 4.89           | 4.38           | 3.85           | 3.42           | 4.33±0.32 |
| 11     | DHMAS 70Q 164-1b             | 1.62                    | 1.85           | 2.11           | 2.58           | 2.45           | 2.12±0.18 |
|        | CD (P<0.05)                  | 1.45                    | 1.28           | 1.20           | 0.95           | 1.05           | -         |
|        | Coefficient of variation (%) | 8.89                    | 8.28           | 5.85           | 6.50           | 7.53           | -         |

**Supplementary Table S11. Agronomic performance of pyramided lines for days to flowering and primary yield attributes under different locations within Kashmir valley**

| S. No. | Line ID                      | Number of effective tillers per plant (NT) |                |                |                |                |            | Spikelets per panicle (SP) |                |                |                |                |              |
|--------|------------------------------|--------------------------------------------|----------------|----------------|----------------|----------------|------------|----------------------------|----------------|----------------|----------------|----------------|--------------|
|        |                              | E <sub>1</sub>                             | E <sub>2</sub> | E <sub>3</sub> | E <sub>4</sub> | E <sub>5</sub> | Mean       | E <sub>1</sub>             | E <sub>2</sub> | E <sub>3</sub> | E <sub>4</sub> | E <sub>5</sub> | Mean         |
| 1      | SKUA-485-27-50-5-5           | 10.25                                      | 11.12          | 11.56          | 10.84          | 10.12          | 10.78±0.27 | 131.30                     | 113.16         | 107.41         | 101.11         | 115.69         | 113.73±5.06  |
| 2      | SKUA-485-27-20-6-4           | 14.50                                      | 13.87          | 13.58          | 13.21          | 12.58          | 13.55±0.32 | 141.52                     | 140.59         | 121.35         | 113.25         | 96.34          | 122.61±8.54  |
| 3      | SKUA-485-27-13-1-3           | 12.50                                      | 13.14          | 12.85          | 12.34          | 11.86          | 12.54±0.22 | 128.33                     | 107.15         | 92.76          | 112.44         | 100.48         | 108.23±6.01  |
| 4      | SKUA-485-27-86-10-4          | 15.21                                      | 15.10          | 15.34          | 14.35          | 13.87          | 14.77±0.28 | 163.00                     | 130.60         | 125.76         | 122.09         | 126.89         | 133.67±7.46  |
| 5      | SKUA-485-27-77-6-2           | 14.96                                      | 14.57          | 14.15          | 13.24          | 13.56          | 14.10±0.32 | 156.25                     | 146.42         | 130.60         | 133.75         | 122.71         | 137.95±5.96  |
| 6      | SKUA-485-27-47-4-1           | 16.83                                      | 17.14          | 16.38          | 16.85          | 15.23          | 16.49±0.34 | 100.04                     | 124.62         | 132.53         | 114.00         | 131.59         | 120.56±6.11  |
| 7      | SKUA-485-27-3-7-5            | 14.00                                      | 14.23          | 14.28          | 13.85          | 13.69          | 14.01±0.11 | 158.93                     | 147.86         | 127.80         | 124.25         | 91.31          | 130.03±11.60 |
| 8      | SKUA-485-27-4-38-4           | 14.67                                      | 15.20          | 14.14          | 14.52          | 14.24          | 14.55±0.19 | 150.24                     | 152.41         | 132.96         | 115.70         | 93.54          | 128.97±11.07 |
| 9      | SKUA-485-27-4-40-6           | 15.24                                      | 14.95          | 13.85          | 14.64          | 13.23          | 14.38±0.37 | 147.51                     | 150.50         | 151.34         | 124.04         | 122.51         | 139.18±6.53  |
| 10     | Mushk Budji                  | 14.18                                      | 14.34          | 13.26          | 12.85          | 12.50          | 13.43±0.36 | 144.43                     | 136.40         | 132.13         | 119.84         | 114.00         | 129.36±5.53  |
| 11     | DHMAS 70Q 164-1b             | 10.23                                      | 10.15          | 11.52          | 10.25          | 11.89          | 10.81±0.37 | 87.98                      | 101.26         | 101.76         | 132.48         | 108.45         | 106.38±7.32  |
|        | CD (P<0.05)                  | 2.49                                       | 2.17           | 1.84           | 2.24           | 1.98           | -          | 25.97                      | 22.15          | 22.20          | 12.38          | 20.83          | -            |
|        | Coefficient of variation (%) | 8.12                                       | 9.51           | 6.52           | 5.14           | 7.31           | -          | 6.23                       | 8.12           | 5.44           | 6.20           | 7.58           | -            |

Contd..

| S. No. | Line ID                      | 1000-seed weight (SW) |                |                |                |                |            | Days to 50% flowering |                |                |                |                |            |
|--------|------------------------------|-----------------------|----------------|----------------|----------------|----------------|------------|-----------------------|----------------|----------------|----------------|----------------|------------|
|        |                              | E <sub>1</sub>        | E <sub>2</sub> | E <sub>3</sub> | E <sub>4</sub> | E <sub>5</sub> | Mean       | E <sub>1</sub>        | E <sub>2</sub> | E <sub>3</sub> | E <sub>4</sub> | E <sub>5</sub> | Mean       |
| 1      | SKUA-485-27-50-5-5           | 24.59                 | 24.61          | 24.32          | 25.67          | 24.96          | 24.83±0.23 | 100.2                 | 108.5          | 92.8           | 95.8           | 89.2           | 97.3±3.33  |
| 2      | SKUA-485-27-20-6-4           | 25.41                 | 24.88          | 25.37          | 25.60          | 25.60          | 25.37±0.13 | 95.3                  | 97.2           | 80.6           | 83.4           | 80.3           | 87.4±3.68  |
| 3      | SKUA-485-27-13-1-3           | 24.40                 | 25.12          | 25.41          | 24.85          | 24.30          | 24.82±0.21 | 102.5                 | 100.5          | 89.2           | 94.5           | 88.1           | 95.0±2.90  |
| 4      | SKUA-485-27-86-10-4          | 24.14                 | 25.58          | 24.25          | 25.79          | 25.41          | 25.03±0.35 | 96.5                  | 93.4           | 81.6           | 85.7           | 84.1           | 88.3±2.85  |
| 5      | SKUA-485-27-77-6-2           | 24.61                 | 24.15          | 25.27          | 24.59          | 25.78          | 24.88±0.29 | 96.2                  | 99.2           | 83.1           | 82.2           | 78.8           | 87.9±4.09  |
| 6      | SKUA-485-27-47-4-1           | 25.21                 | 25.41          | 24.65          | 24.63          | 24.78          | 24.94±0.16 | 93.1                  | 99.1           | 81.4           | 84.7           | 80.4           | 87.7±3.61  |
| 7      | SKUA-485-27-3-7-5            | 24.20                 | 25.81          | 24.27          | 24.36          | 24.83          | 24.69±0.30 | 90.4                  | 96.2           | 82.8           | 79.5           | 75.2           | 84.8±3.78  |
| 8      | SKUA-485-27-4-38-4           | 25.44                 | 24.95          | 25.82          | 25.49          | 25.63          | 25.47±0.14 | 93.5                  | 97.0           | 85.1           | 83.6           | 79.4           | 87.7±3.26  |
| 9      | SKUA-485-27-4-40-6           | 25.42                 | 24.30          | 25.51          | 25.67          | 24.53          | 25.09±0.28 | 97.2                  | 101.2          | 87.8           | 85.2           | 80.7           | 90.4±3.81  |
| 10     | Mushk Budji                  | 25.20                 | 25.58          | 25.50          | 25.30          | 24.26          | 25.17±0.24 | 95.4                  | 100.4          | 85.2           | 85.3           | 80.7           | 89.4±3.65  |
| 11     | DHMAS 70Q 164-1b             | 18.59                 | 18.91          | 18.32          | 19.11          | 19.60          | 18.91±0.22 | 120.3                 | 125.5          | 115.8          | 113.8          | 110.1          | 117.1±2.67 |
|        | CD (P<0.05)                  | 0.74                  | 0.79           | 0.84           | 0.75           | 0.79           | -          | 5.21                  | 4.95           | 6.88           | 5.50           | 4.82           | -          |
|        | Coefficient of variation (%) | 3.12                  | 4.64           | 2.58           | 2.90           | 3.33           | -          | 3.82                  | 5.65           | 4.48           | 6.30           | 7.21           | -          |

**Supplementary Table S12. Physico-chemical and cooking quality traits of pyramided lines**

| Line ID | Plant ID                     | KLBC (mm) | LBR       | KLAC (mm)  | KER       | GC       | AC (%)     | Hulling (%) | Milling (%) | ASV | Aroma (0-2 scale) |
|---------|------------------------------|-----------|-----------|------------|-----------|----------|------------|-------------|-------------|-----|-------------------|
| 1       | SKUA-485-27-50-5-5           | 4.89±0.08 | 1.82±0.02 | 8.18±0.12  | 1.67±0.03 | 92±4.12  | 15.21±0.90 | 80.46±2.33  | 70.77±3.10  | 4   | 1                 |
| 2       | SKUA-485-27-20-6-4           | 5.34±0.07 | 1.77±0.03 | 8.21±0.11  | 1.54±0.02 | 95±5.55  | 18.12±1.12 | 84.54±3.14  | 74.32±3.67  | 4   | 2                 |
| 3       | SKUA-485-27-13-1-3           | 5.45±0.07 | 1.80±0.04 | 8.41±0.09  | 1.54±0.02 | 96±6.28  | 17.45±0.85 | 83.15±1.87  | 73.15±3.15  | 4   | 2                 |
| 4       | SKUA-485-27-86-10-4          | 5.33±0.08 | 1.75±0.02 | 8.39±0.10  | 1.57±0.03 | 93±5.80  | 17.66±0.95 | 86.15±2.45  | 76.89±2.95  | 4   | 2                 |
| 5       | SKUA-485-27-77-6-2           | 5.52±0.10 | 1.75±0.02 | 8.43±0.12  | 1.53±0.04 | 98±4.15  | 19.35±1.02 | 74.62±3.66  | 74.42±3.11  | 4   | 2                 |
| 6       | SKUA-485-27-47-4-1           | 5.13±0.07 | 1.85±0.03 | 7.88±0.11  | 1.54±0.03 | 95±6.32  | 16.82±1.20 | 78.12±3.50  | 69.10±2.74  | 4   | 2                 |
| 7       | SKUA-485-27-3-7-5            | 5.11±0.08 | 1.72±0.02 | 8.31±0.10  | 1.63±0.02 | 93±3.19  | 17.71±0.82 | 86.24±2.94  | 78.12±3.68  | 4   | 2                 |
| 8       | SKUA-485-27-4-38-4           | 5.51±0.10 | 1.63±0.02 | 8.11±0.08  | 1.47±0.02 | 97±4.66  | 18.45±0.90 | 84.52±4.45  | 76.89±4.00  | 5   | 2                 |
| 9       | SKUA-485-27-4-40-6           | 5.5±0.09  | 1.70±0.04 | 8.26±0.10  | 1.50±0.03 | 97±5.87  | 18.91±0.94 | 85.61±3.77  | 75.32±3.45  | 5   | 2                 |
| 10      | <i>Mushk Budji</i>           | 5.45±0.08 | 1.65±0.03 | 8.13±0.11  | 1.49±0.02 | 115±6.30 | 14.14±1.05 | 86.25±4.66  | 78.25±3.10  | 4   | 2                 |
| 11      | DHMAS 70Q 164-1b             | 6.53±0.08 | 2.64±0.03 | 10.52±0.14 | 1.61±0.03 | 55±3.21  | 21.52±0.88 | 82.23±3.58  | 70.33±2.82  | 6   | 0                 |
|         | CD (P<0.05)                  | 0.14      | 0.05      | 0.11       | 0.04      | 4.42     | 1.09       | 2.81        | 2.05        |     |                   |
|         | Coefficient of variation (%) | 3.12      | 2.45      | 3.34       | 2.56      | 2.66     | 4.18       | 5.64        | 5.28        |     |                   |

**Supplementary Table S13. Disease reaction under uniform blast nursery across five hot spot locations**

| S. No. | Plant ID            | Gene combination     | Leaf blast reaction |        |          |          |        |
|--------|---------------------|----------------------|---------------------|--------|----------|----------|--------|
|        |                     |                      | Sagam               | Pombay | Khudwani | Shalimar | Budgam |
| 1      | SKUA-485-27-50-5-5  | <i>Pi54+Pi1+Pita</i> | 5                   | 3      | 4        | 5        | 2      |
| 2      | SKUA-485-27-20-6-4  | <i>Pi54+Pi1+Pita</i> | 1                   | 0      | 0        | 0        | 0      |
| 3      | SKUA-485-27-13-1-3  | <i>Pi54+Pi1+Pita</i> | 3                   | 1      | 2        | 0        | 2      |
| 4      | SKUA-485-27-86-10-4 | <i>Pi54+Pi1+Pita</i> | 1                   | 0      | 0        | 0        | 0      |
| 5      | SKUA-485-27-77-6-2  | <i>Pi54+Pi1+Pita</i> | 1                   | 0      | 0        | 0        | 1      |
| 6      | SKUA-485-27-47-4-1  | <i>Pi54+Pi1</i>      | 1                   | 2      | 0        | 1        | 2      |
| 7      | SKUA-485-27-3-7-5   | <i>Pi54+Pi1+Pita</i> | 1                   | 0      | 0        | 0        | 0      |
| 8      | SKUA-485-27-4-38-4  | <i>Pi54+Pi1+Pita</i> | 1                   | 0      | 0        | 0        | 0      |
| 9      | SKUA-485-27-4-40-6  | <i>Pi54+Pi1+Pita</i> | 1                   | 1      | 0        | 1        | 0      |
| 10     | Mushk Budji         |                      | 9                   | 5      | 8        | 7        | 8      |
| 11     | DHMAS 70Q 164-1b    | <i>Pi54+Pi1+Pita</i> | 1                   | 0      | 0        | 0        | 0      |

Field reaction scoring was carried out on 0-9 scale as per SES IRRI (1996); Score 0-3: R; 4-5: MR; 6-7: MS; 8-9: S



**Supplementary Table S14: Primer sequence of markers used for foreground selection**

| Gene        | Marker name     | Forward / Reverse | Primer sequence             | Chromosome | Linkage distance | Ref |
|-------------|-----------------|-------------------|-----------------------------|------------|------------------|-----|
| <i>Pi54</i> | <i>Pi54</i> MAS | F                 | 5'-CAATCTCCAAAGTTTTTCAGG-3' | 11         | Gene based       | 42  |
|             |                 | R                 | 5'-GCTTCAATCACTGCTAGACC-3'  |            |                  |     |
| <i>Pil</i>  | RM224           | F                 | 5'-ATCGATCGATCTTCACGAGG-3'  | 11         | 0.0 cM           | 43  |
|             |                 | R                 | 5'-TGCTATAAAAGGCATTCGGG-3'  |            |                  |     |
| <i>Pita</i> | YL155/87        | F                 | 5'-AGCAGGTTATAAGCTAGGCC-3'  | 12         | Gene based       | 44  |
|             |                 | R                 | 5'-CTACCAACAAGTTCATCAAA-3'  |            |                  |     |
|             | YL155/83        | F                 | 5'-CAACAATTTAATCATACACG-3'  |            |                  |     |
|             |                 | R                 | 5'-ATGACACCCTGCGATGCAA-3'   |            |                  |     |

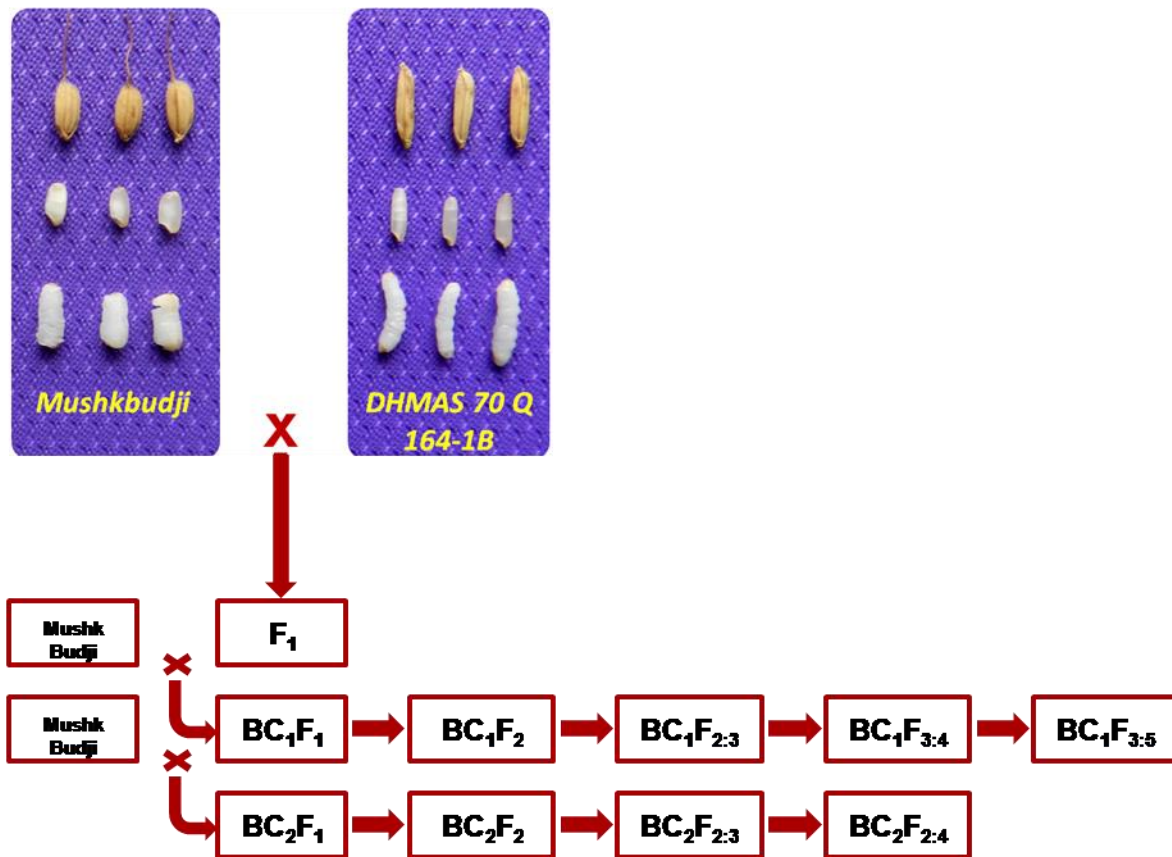

**Supplementary Fig. S1: Marker-assisted backcross breeding scheme adopted for transfer of genes *Pi54+Pi1+Pita*.** Seventeen BC<sub>1</sub>F<sub>1</sub> plants were generated. Marker-assisted foreground analysis (FG) helped to identify plants carrying following gene combinations: *Pi54+Pita+Pi1* (SKAU-485-27)=1; *Pi54+Pi1*= 6; *Pi54*= 3; *Pi1*= 6; Recessive=1; 234 BC<sub>2</sub>F<sub>1</sub> plants were produced; 45 of which came from backcrossing of single three-gene heterozygote namely, SKAU-485-27; FG helped to select the plants carrying: *Pi54+Pi1+Pita*=2; *Pi54+Pi1*= 13; *Pi54*= 5; *Pi1*= 5; *Pita*=10; recessive alleles= 3; and four were not harvested; 789 BC<sub>1</sub>F<sub>2</sub> plants were harvested of which 86 analyzed were obtained from selfing of single three-gene heterozygote (SKAU-485-27). FG of 86 plants revealed: *Pi54+Pi1+Pita*=2; *Pi54+Pi1*= 10; *Pi54+Pita*= 1; *Pi1+Pita*= 1; 49 BC<sub>2</sub>F<sub>2</sub> plants were put to FG out of plants obtained from selfing of two triple-heterozygotes. These yielded *Pi54+Pi1+Pita*=3; *Pi1*= 8; *Pita*= 23; 14 BC<sub>1</sub>F<sub>2:3</sub> families (two from two 3-gene pyramids) comprising 1400 plants were grown of which 104 selected; 3 BC<sub>2</sub>F<sub>2:3</sub> families (from three 3-gene pyramids) comprising 1500 plants were grown; 30 single plants selections (SPS) made per family and bulked; Nine BC<sub>1</sub>F<sub>3:4</sub> SPS grown and harvested in bulk; Three BC<sub>2</sub>F<sub>2:3</sub> pyramided lines grown across five locations; Nine BC<sub>1</sub>F<sub>3:5</sub> pyramided lines grown across five locations.

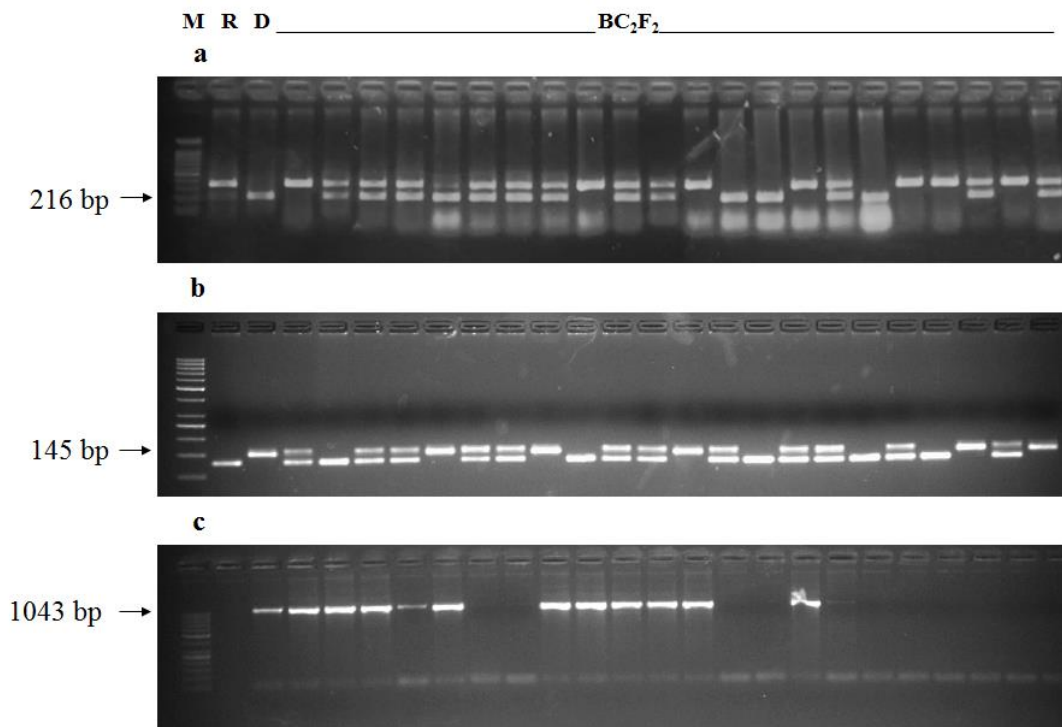

**Supplementary Fig. S2: Foreground selection in BC<sub>2</sub>F<sub>2</sub> for the genes *Pi54*, *Pi1* and *Pita***

a: InDel marker *Pi54* MAS; b: SSR marker RM224; c: SNP based dominant marker YL155/87; Lanes M: 50bp size standard (Fermentas, Lithuania, U.S.); R: Mushk Budji; D: DHMAS 70Q 164-1b; Lanes 1-22: BC<sub>2</sub>F<sub>2</sub> single plant selections from three-gene BC<sub>2</sub>F<sub>1</sub>. Lane 7: Plant# SKUA-485-27-4 homozygous for three genes (*Pi54*+*Pi1*+*Pita*). (Refer Supplementary Fig. S12-14)

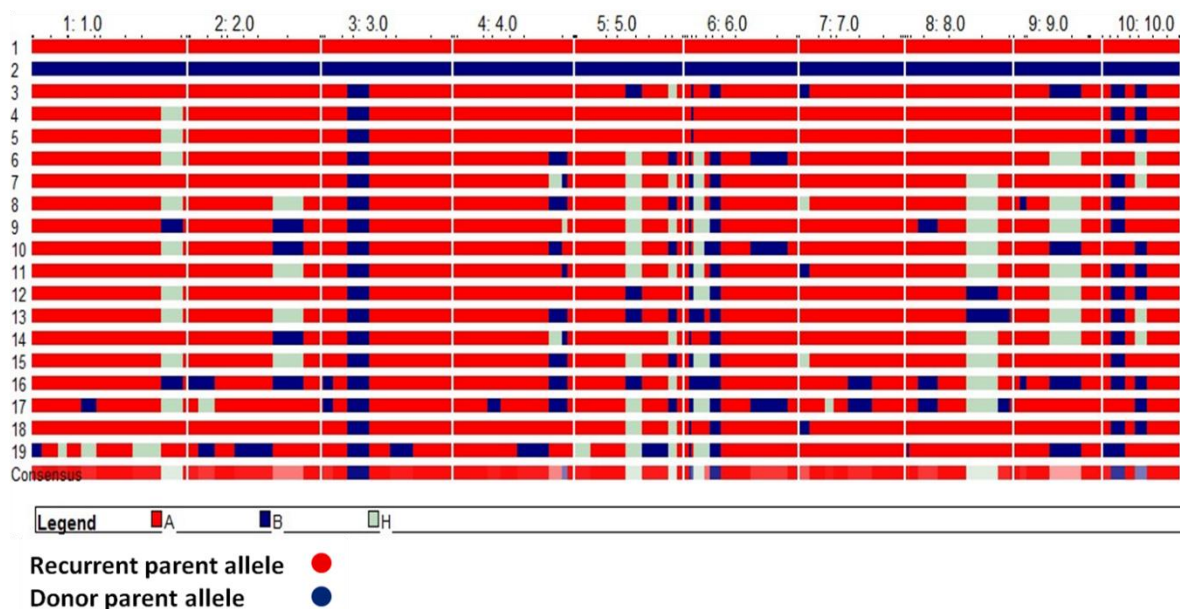

**Supplementary Fig. S3: Graphical genotype of marker-assisted background selection (on non-carrier chromosomes) of pyramided lines carrying blast resistance genes *Pi54*, *Pi1* and *Pita*.** Bar1: Mushk Budji; Bar 2: DHMAS 70Q 164-1b; Bar 3-19: Backcross derived lines.

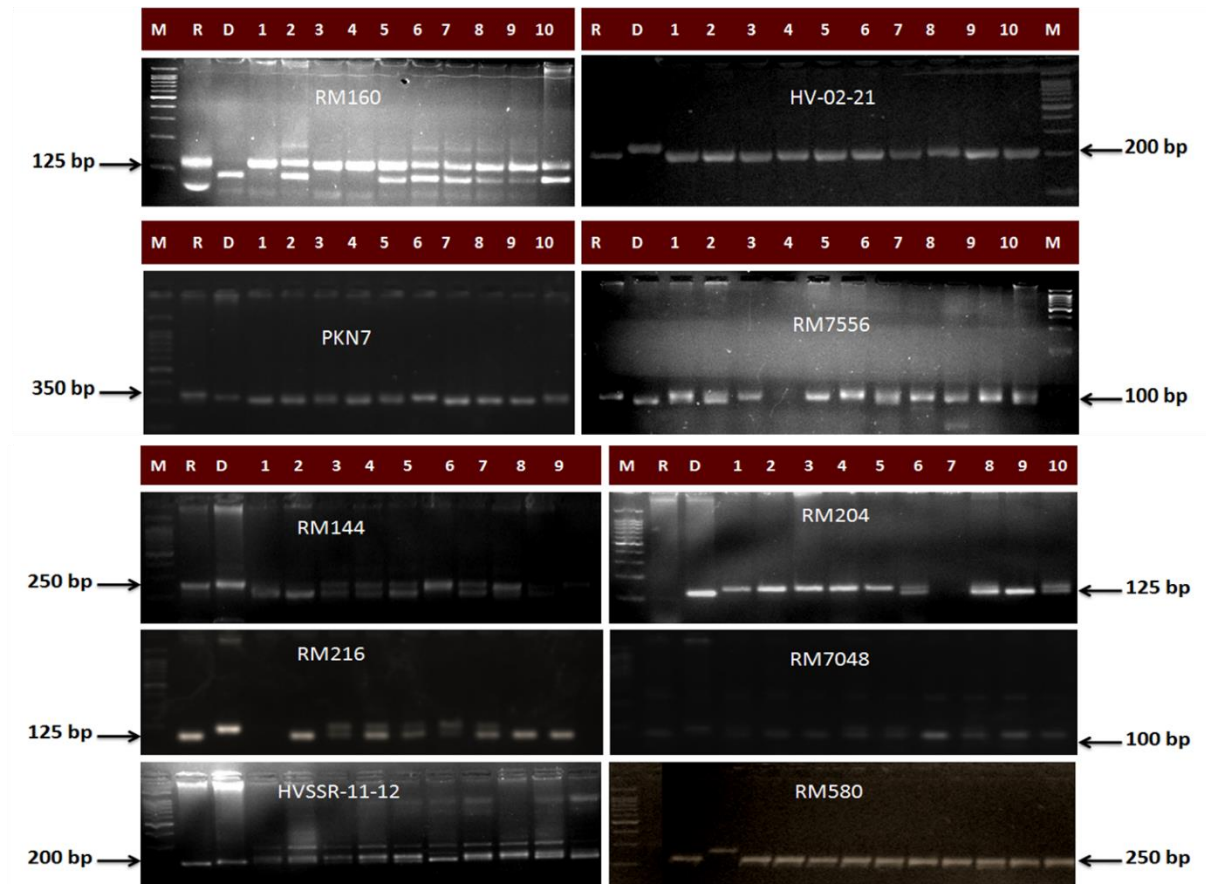

**Supplementary Fig. S4: Gel image depicting recurrent parent genome recovery of pyramided lines carrying blast resistance genes *Pi54*, *Pi1* and *Pita*.** R: Mushk Budji; D: DHMAS 70Q 164-1b; Lane 1-10: Backcross derived lines; M: 50 bp size standard (Fermentas, Luthuania, U S).

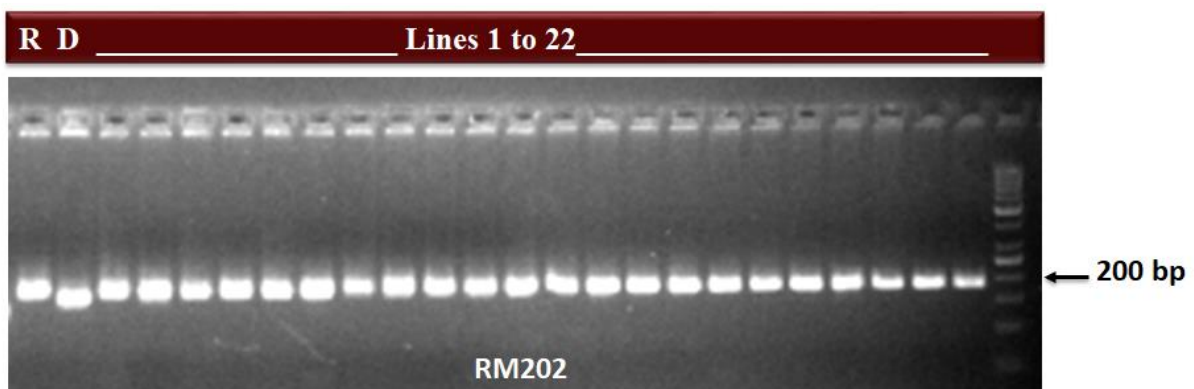

**Supplementary Fig. S5: Gel image depicting recurrent parent genome recovery of pyramided lines.** R: Mushk Budji; D: DHMAS 70Q 164-1b; Lane 1-22: Backcross derived lines; M: 50 bp size standard (Fermentas, Luthuania, U S).

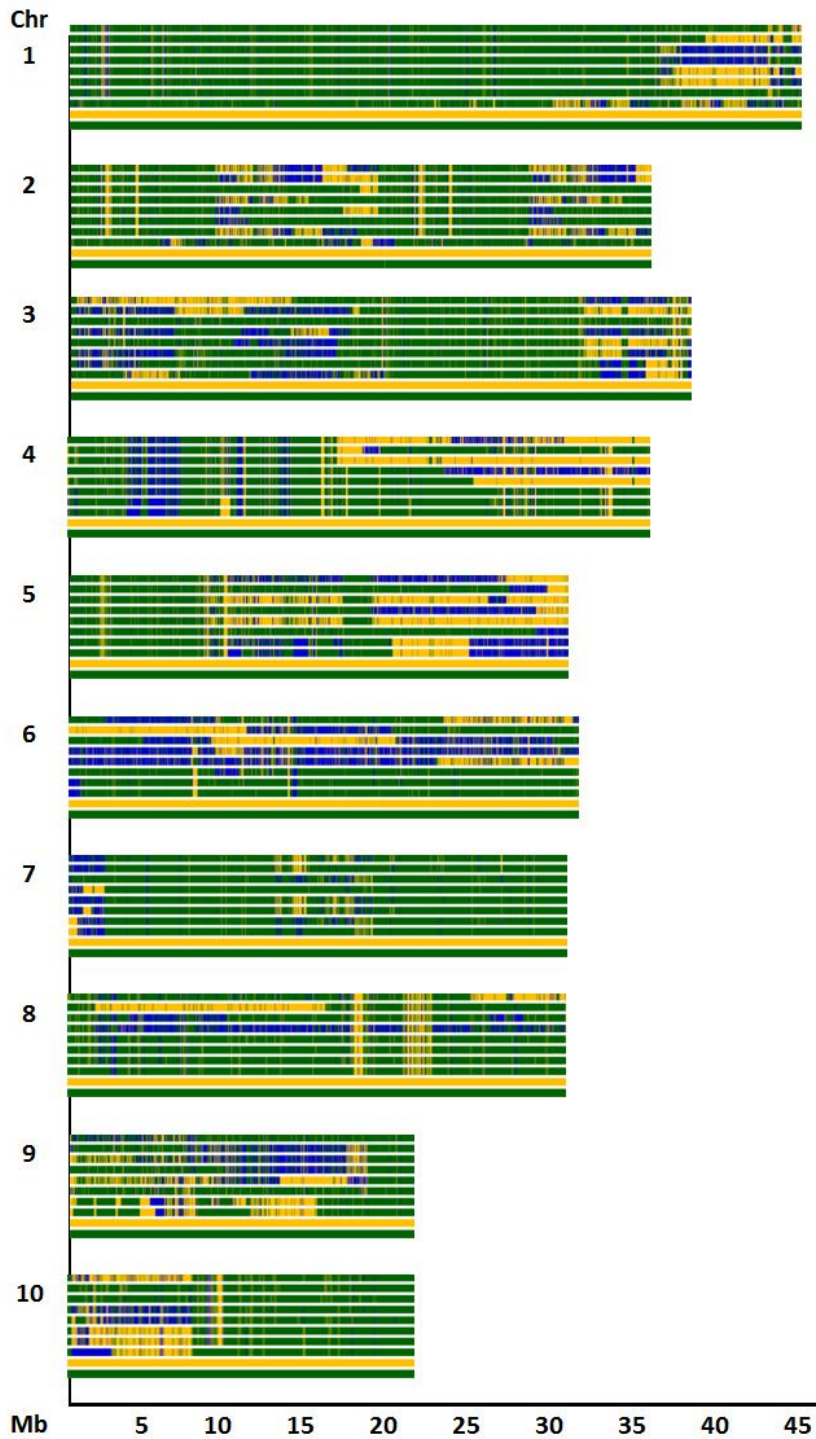

**Supplementary Fig. S6: RPG recovery of pyramided lines based on ‘OsSNPnks’ 50K Axiom® 2.0 SNP array for non-carrier chromosomes.** Bar number 1-10: Mushk Budji; DHMAS 70Q 164-1b; SKUA-485-27-4-38-4; SKUA-485-27-4-40-6; SKUA-485-27-3-7-5; SKUA-485-27-13-1-3; SKUA-485-27-20-6-4; SKUA-485-27-47-4-1; SKUA-485-27-77-6-2; SKUA-485-27-86-10-4; Yellow: Recurrent parent allele; Green: Donor allele; Blue: Heterozygous allele; x-axis represents the Mb position of respective chromosomes, 1 to 10.

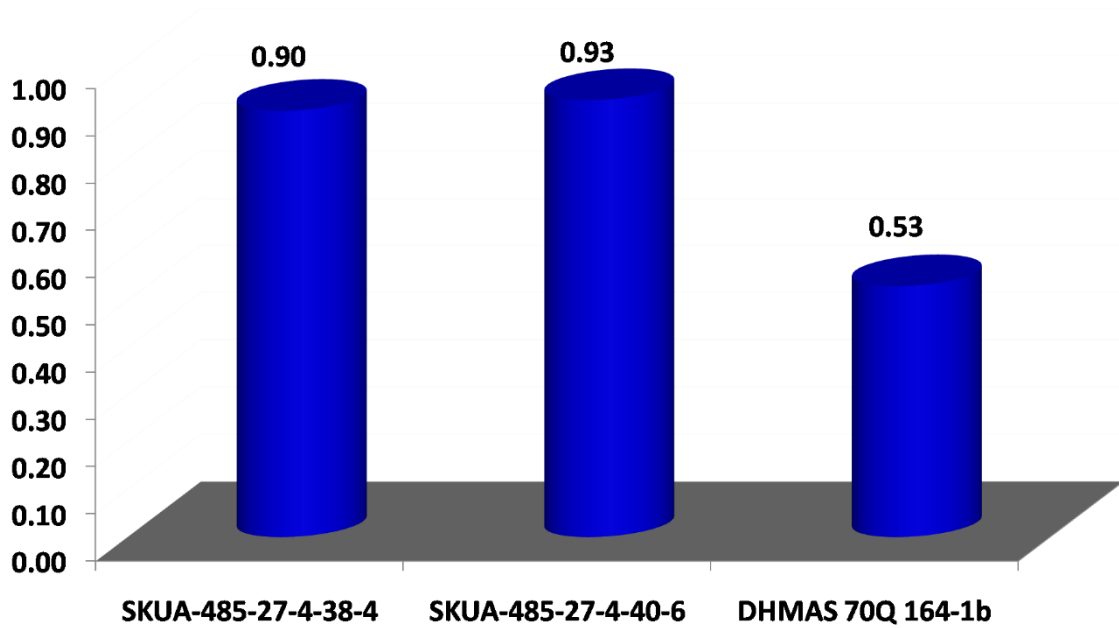

**Supplementary Fig. S7: Protein match score of pyramided lines and donor with respect to recurrent parent in 2D-Gel electrophoresis.** SKUA-485-27-4-38-4 and SKUA-485-27-4-40-6 share 90 and 93% of protein identity with RP *Mushk Budji* as compared to donor DHMAS 70Q 164-1b that shows only 53% similarity.



SKUA-485-27-4-40-6   SKUA-485-27-4-38-4   DHMAS 70Q 164-1b   Mushk Budji

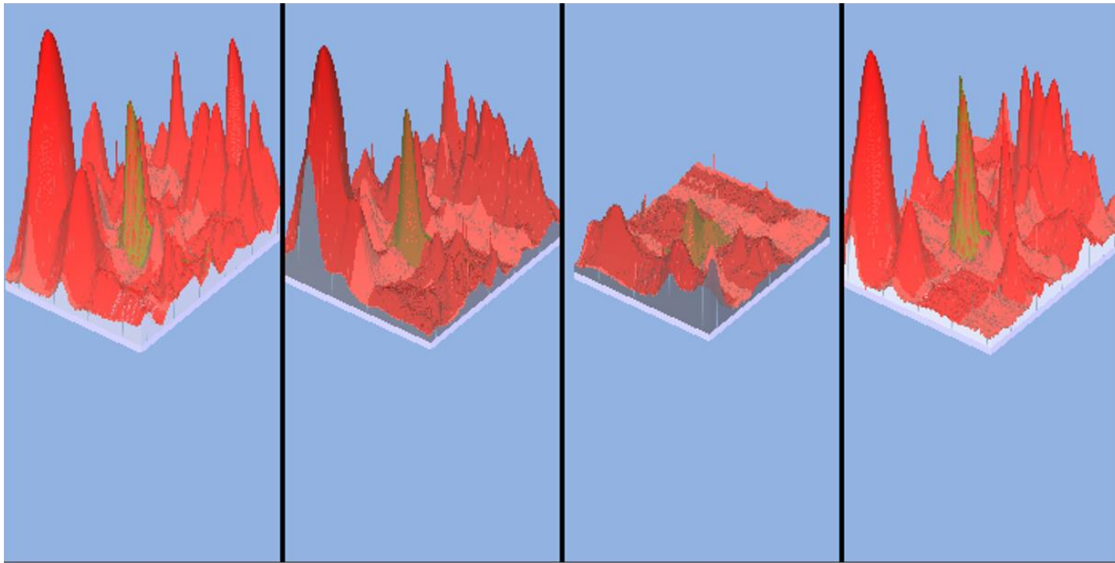

| Protein       | Match ID | Fold    | Match Count | Mushk Budji | SKUA-485-27-4-38-4 | SKUA-485-27-4-40-6 | DHMAS 70Q 164-1b | ANOVA   |
|---------------|----------|---------|-------------|-------------|--------------------|--------------------|------------------|---------|
| Alpha-amylase | 33       | 3.60399 | 4           | 0.75007     | 0.70812            | 0.74073            | 0.41193          | 0.00467 |

**Supplementary Fig. S8: Fold change in protein expression of pyramided lines and RP in comparison to donor line for Alpha-amylase**

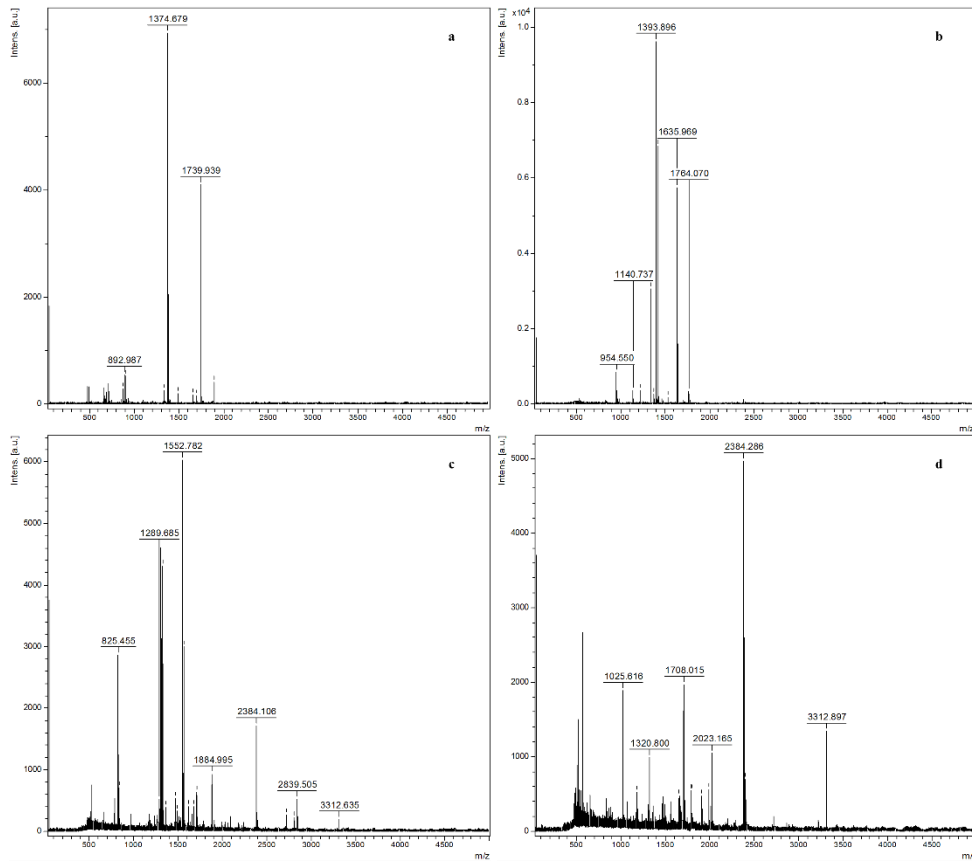

**Supplementary Fig. S9: MALDI-TOF analysis of spots in recipient parent *Mushk Budji* / donor DHMAS 70Q 164-1b.** a: Alpha-amylase; b: Trioisophosphate isomerase; c: 19 kDa globulin; d: S-(+)-linalool synthase.



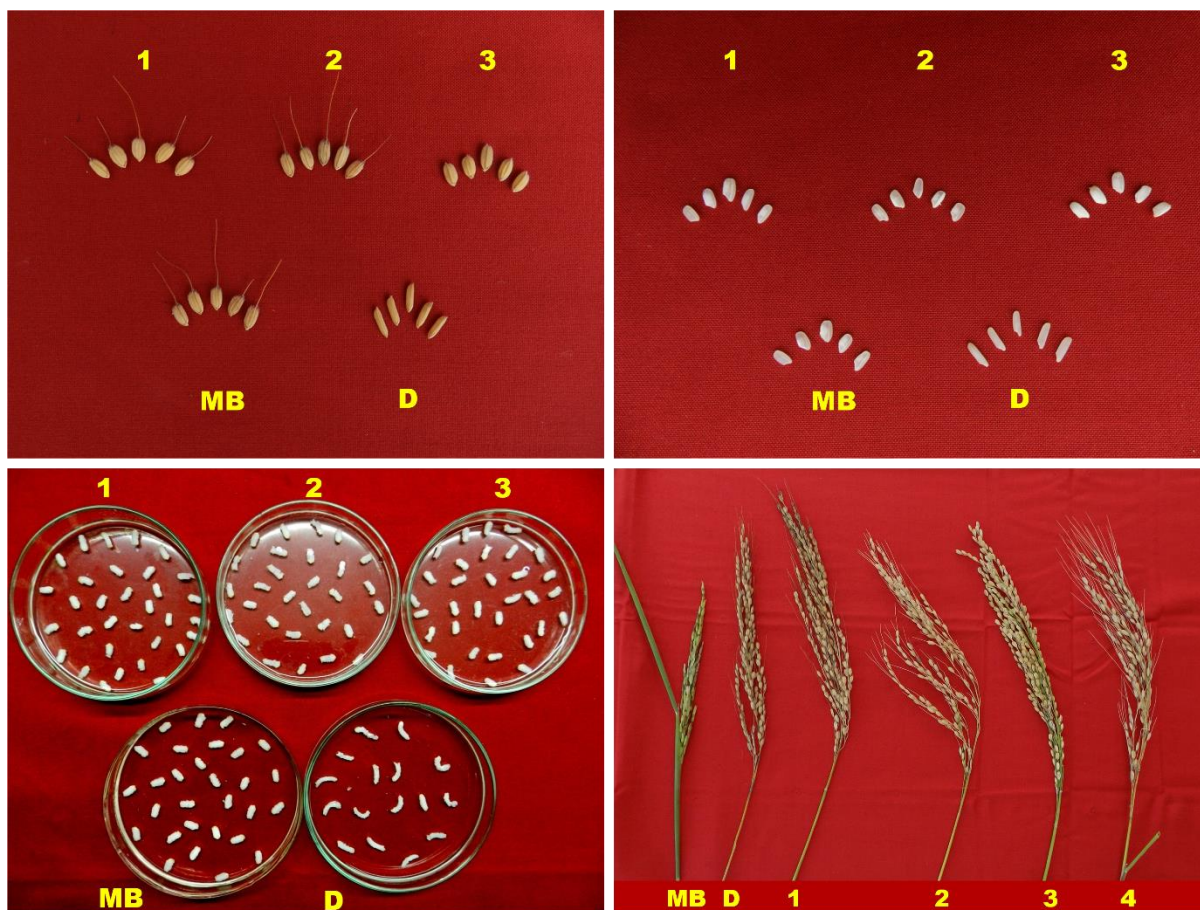

**Supplementary Fig. S10: Recovery in grain type, kernel features, cooking quality and panicle attribute of pyramided lines.** MB: Mushk Budji; D: DHMAS 70Q 164-1b; 1: SKUA-485-27-4-38-4; 2: SKUA-485-27-4-40-6; 3: SKUA-485-27-20-6-4; 4: SKUA-485-27-3-7-5.

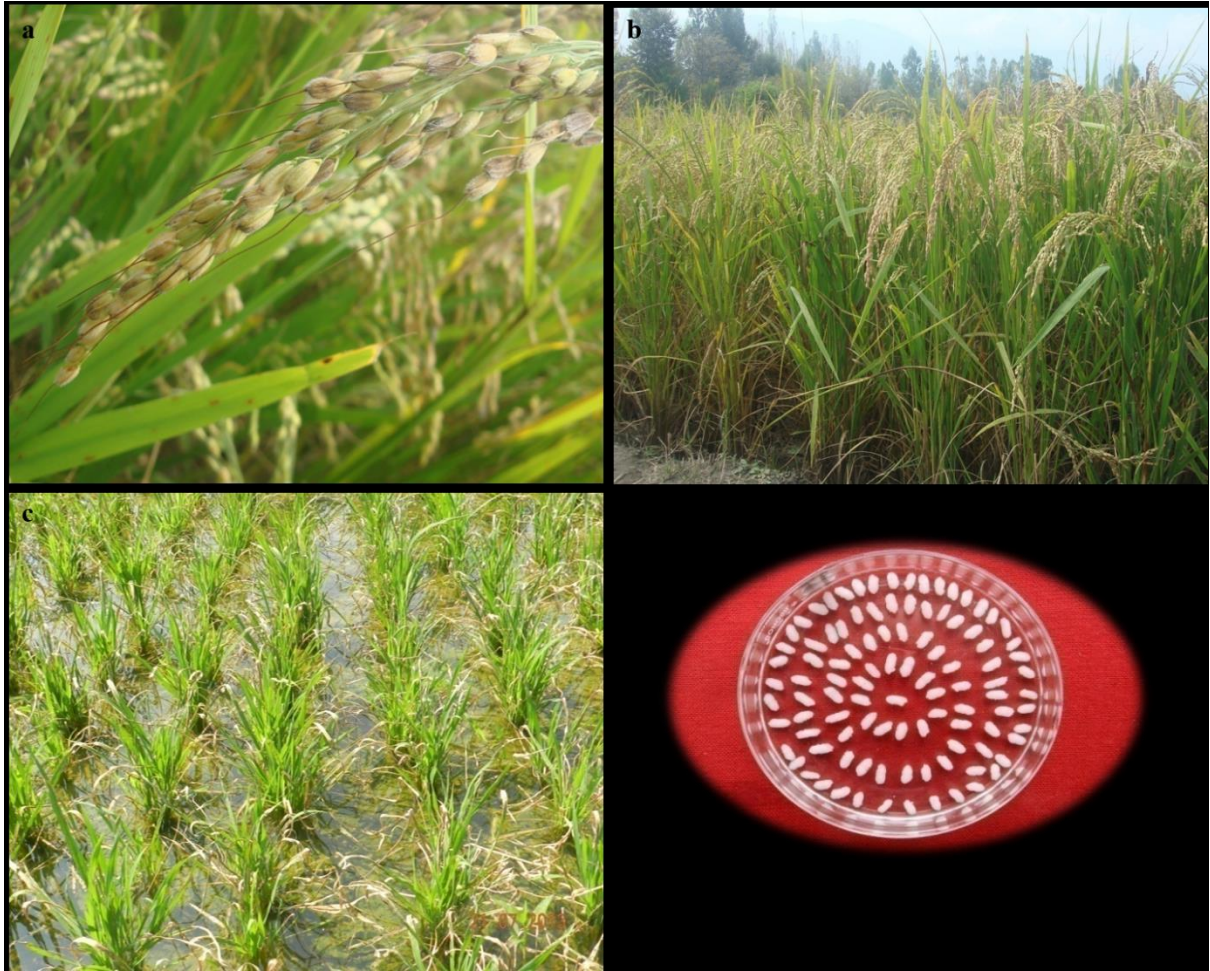

**Supplementary Fig. S11: Morphological features of recurrent parent Mushk Budji.** a: Panicle and grain type; b: Plant architecture; c: Mushk Budji at early seedling stage showing heavy blast incidence on leaves; d: Cooked rice.

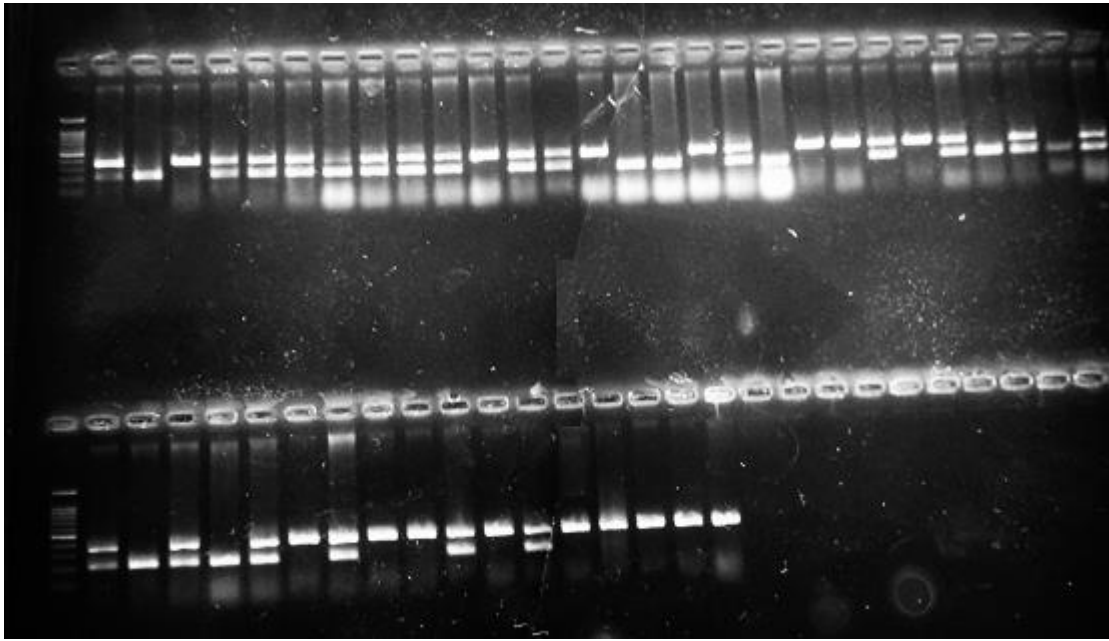

**Supplementary Fig. S12:** Foreground selection in  $BC_2F_2$  for blast resistance gene *Pi54* using InDel marker Pi54 MAS.

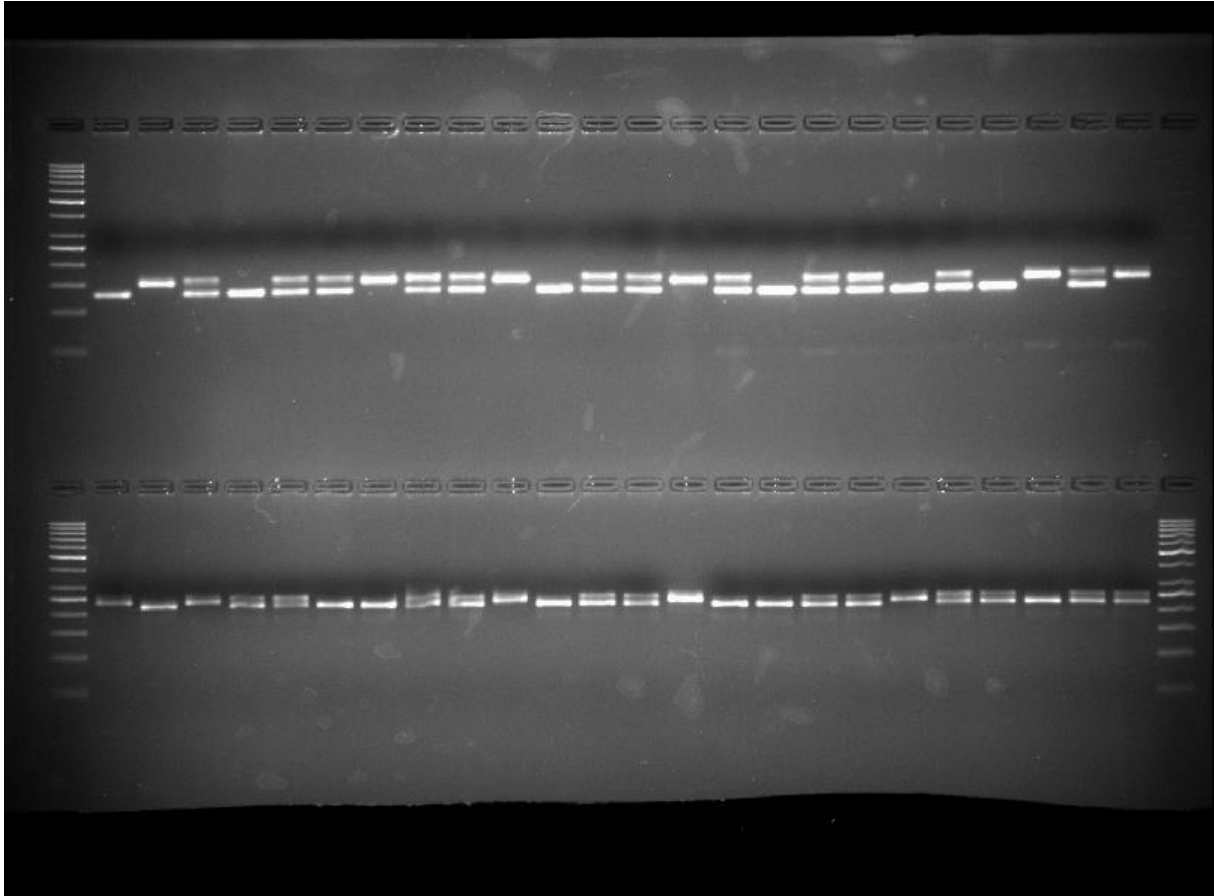

**Supplementary Fig. S13: Foreground selection in BC<sub>2</sub>F<sub>2</sub> for blast resistance gene *Pi1* (above panel) using gene linked marker RM224.**

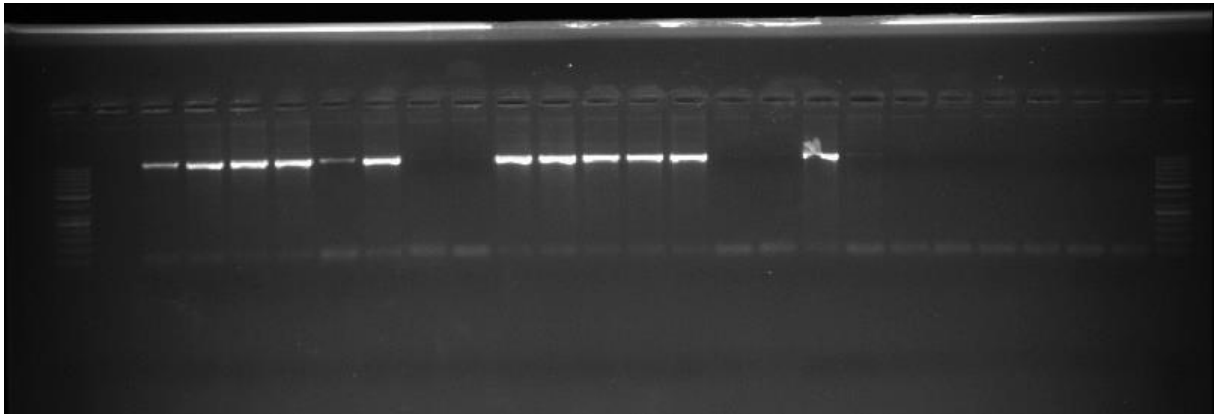

**Supplementary Fig. S14: Foreground selection in BC<sub>2</sub>F<sub>2</sub> for blast resistance gene *Pita* using SNP based dominant marker YL155/87.**



Mushk Buji      SKUA-485-27-13-1-3      Mushk Budji      DHMAS 70Q 164-1b      SKUA-485-27-4-40-6

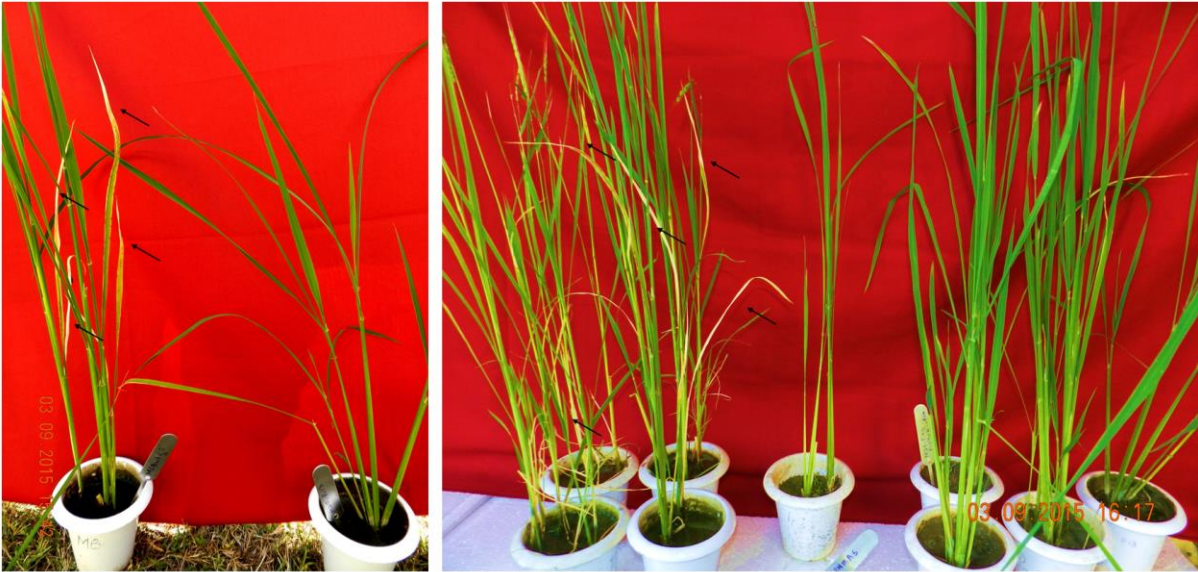

**Supplementary Fig. S15: The reaction of pyramided lines to isolate Mo-ei-MBI-2.** Arrow heads point at blast lesions.

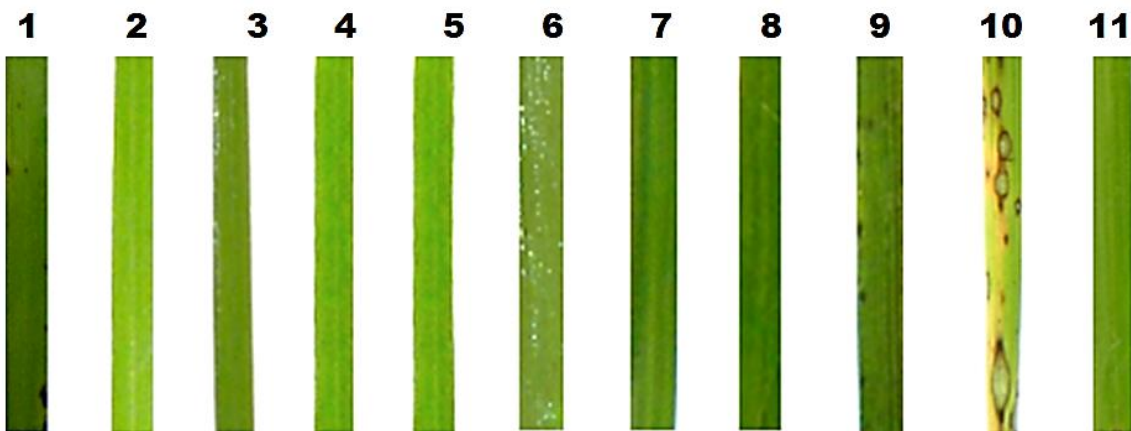

**Supplementary Fig. S16: The reaction of pyramided lines to isolate Mo-nwi-kash-32.**

Sequence of pyramided lines screened under controlled conditions: 1: SKUA-485-27-50-5-5 (1); 2: SKUA-485-27-20-6-4 (0); 3: SKUA-485-27-13-1-3 (0); 4: SKUA-485-27-86-10-4 (0); 5: SKUA-485-27-77-6-2 (0); 6: SKUA-485-27-47-4-1 (0); 7: SKUA-485-27-3-7-5 (0); 8: SKUA-485-27-4-38-4 (0); 9: SKUA-485-27-4-40-6 (1); 10: Mushk Budji (5); 11: DHMAS 70Q 164-1b (0). The values in parenthesis indicate blast score as defined in Table 3.

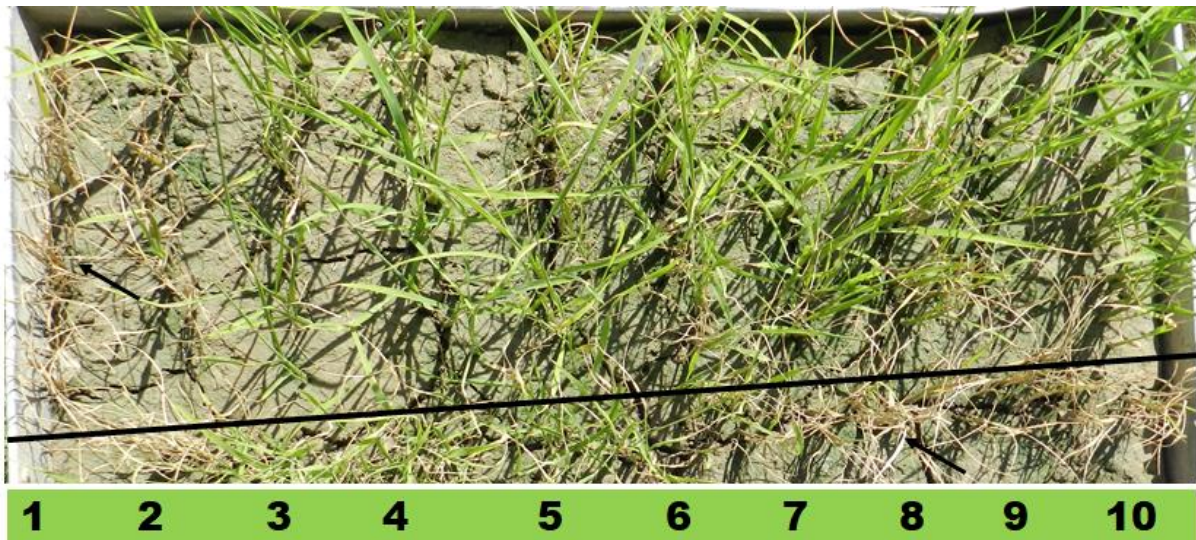

**Supplementary Fig. S17: The reaction of pyramided lines to isolate SKUA-Mo-3.** Sequence of pyramided lines screened under controlled conditions: 1: Mushk Budji; 2: SKUA-485-27-50-5-5; 3: SKUA-485-27-20-6-4; 4: SKUA-485-27-13-1-3; 5: SKUA-485-27-86-10-4; 6: SKUA-485-27-77-6-2; 7: SKUA-485-27-47-4-1; 8: SKUA-485-27-3-7-5; 9: SKUA-485-27-4-38-4; 10: SKUA-485-27-4-40-6. Mushk Budji was also planted as a border row as demarcated by a line; Arrow heads indicate Mushk Budji line showing susceptible reaction.



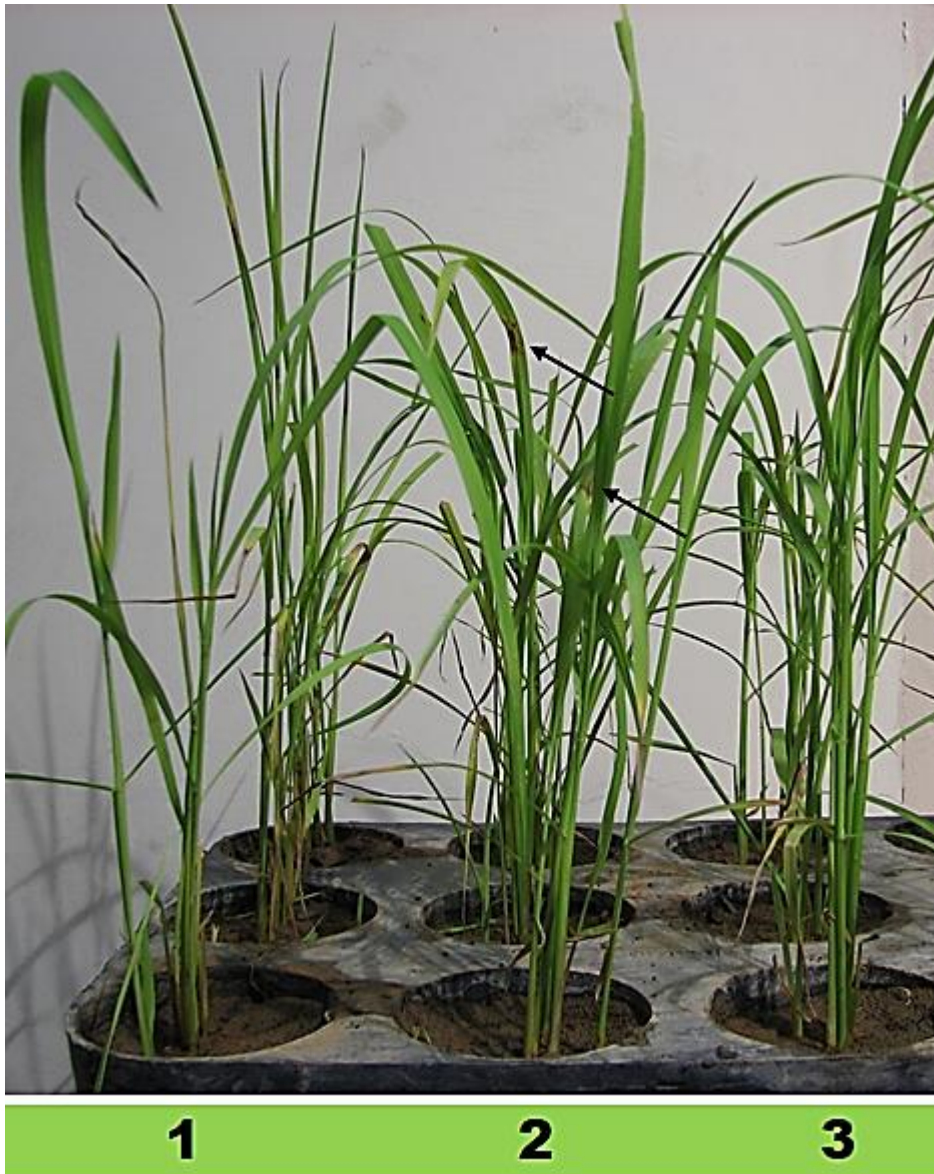

**Supplementary Fig. S18: The reaction of pyramided lines to isolate SKUA-Mo-9.** Sequence of pyramided lines screened under controlled conditions: 1: SKUA-485-27-50-5-5; 2: Mushk Budji; 3: SKUA-485-27-4-38-4. Arrow marks point at blast lesions.
